# Supplementary material for: Autophagy suppresses Ras-driven epithelial tumourigenesis by limiting the accumulation of reactive oxygen species
Source: PubMed Central journal article supplement (PMC5633656; doi:10.1038/onc.2017.175), 2017-06-05

# VAMP2 low

# VAMP2 high

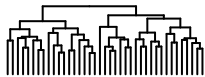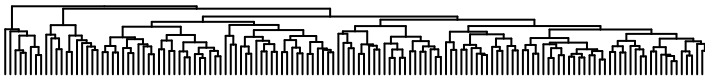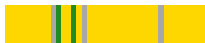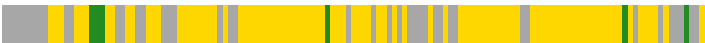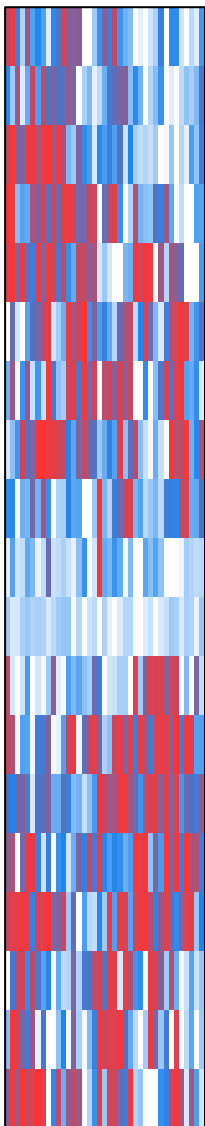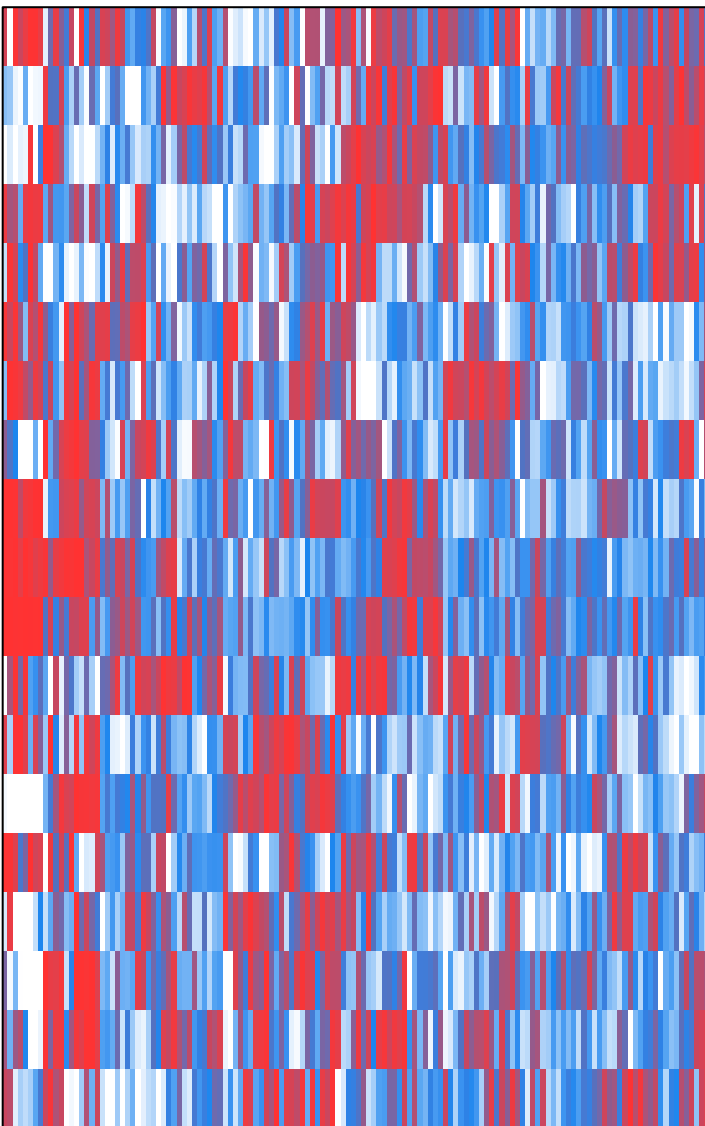

GABARAPL1

MAP1LC3C

VAMP7

GABARAPL3

STX17

ABCB6

ATG9A

SNAP29

GABARAPL2

GABARAP

VAMP2

VAMP1

ATG9B

VAMP8

VAMP4

VTI1A

ATG7

VAMP5

VAMP3

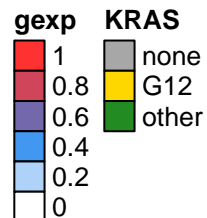

## GABARAP low

## GABARAP high

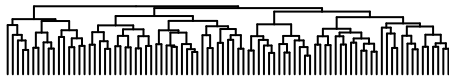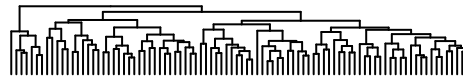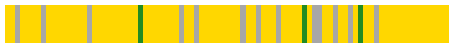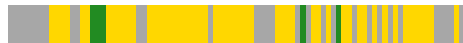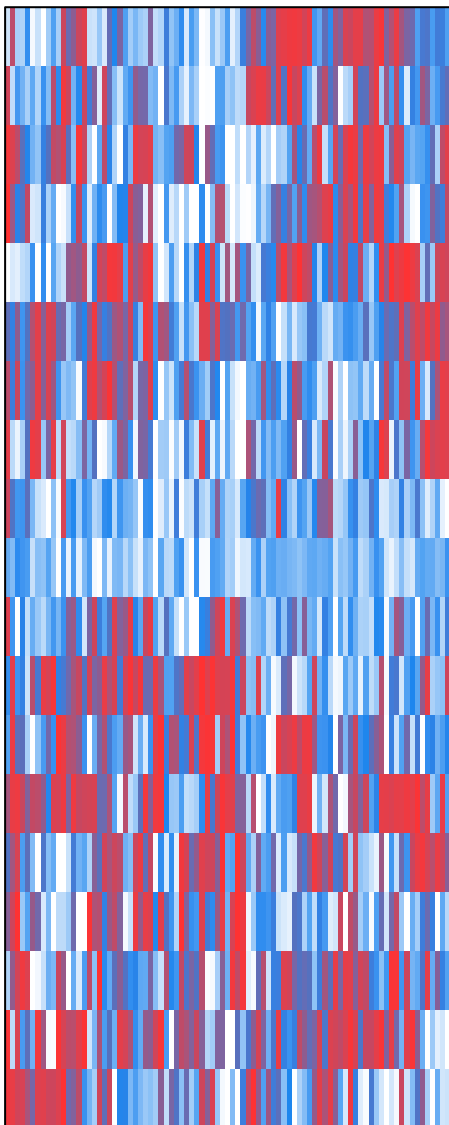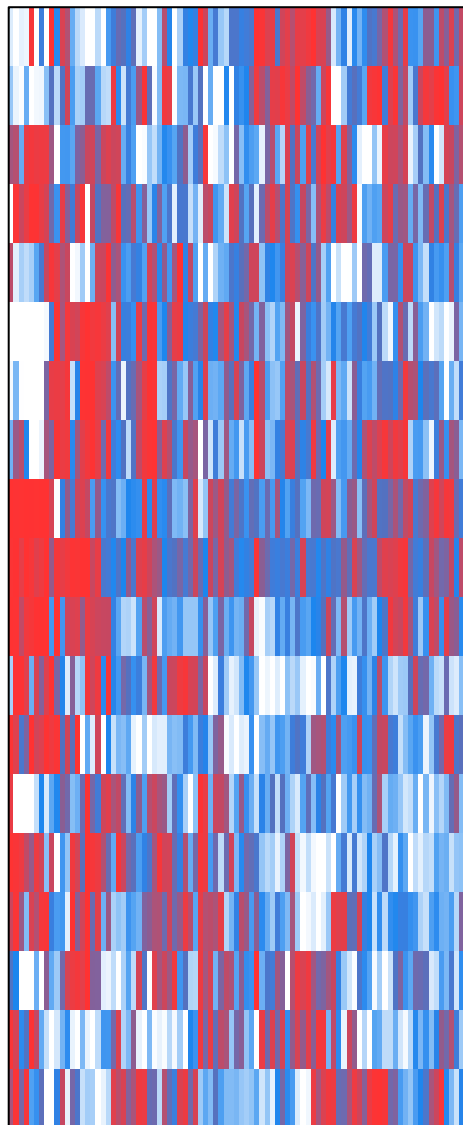

VAMP7

MAP1LC3C

GABARAPL3

GABARAPL1

VAMP3

VAMP8

ATG7

VAMP5

VAMP2

GABARAP

GABARAPL2

ATG9B

VAMP4

VT11A

ATG9A

ABCB6

SNAP29

STX17

VAMP1

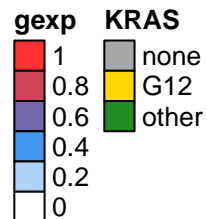

## VAMP3 low

## VAMP3 high

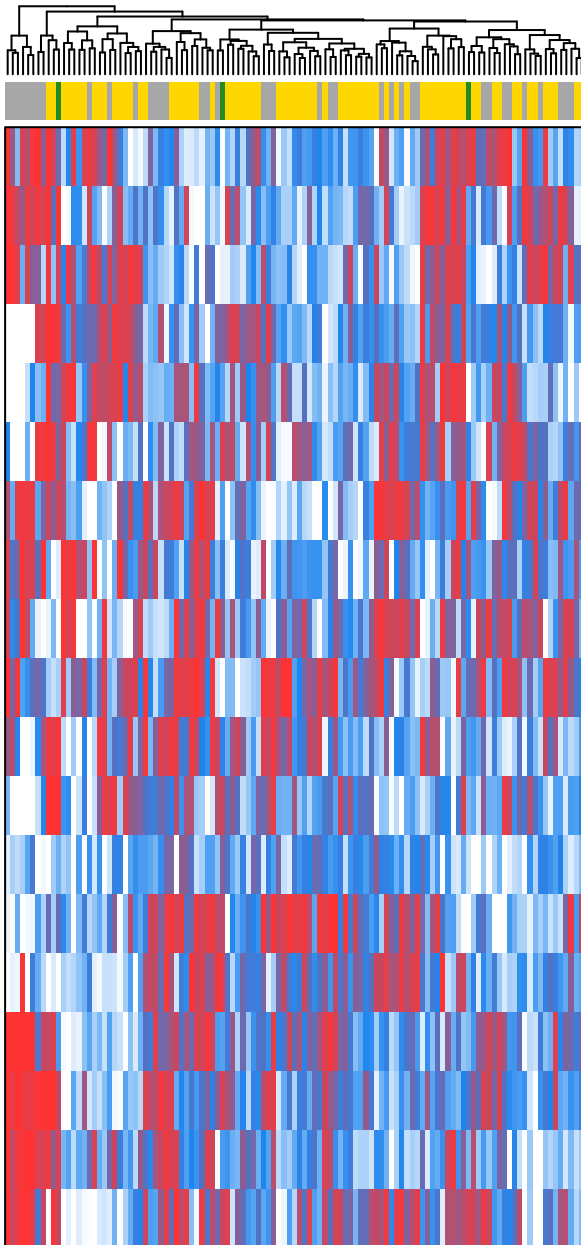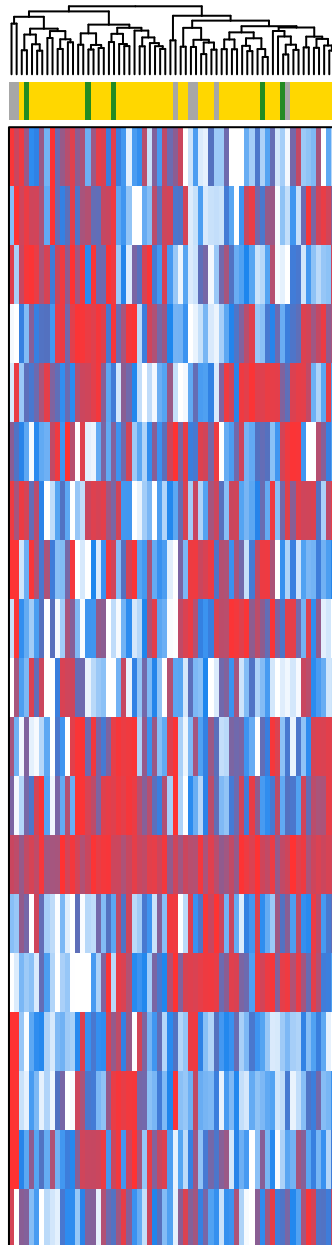

ABCB6

ATG9A

ATG9B

VAMP8

VT11A

SNAP29

GABARAPL3

VAMP4

STX17

VAMP1

VAMP5

ATG7

VAMP3

MAP1LC3C

VAMP7

VAMP2

GABARAP

GABARAPL2

GABARAPL1

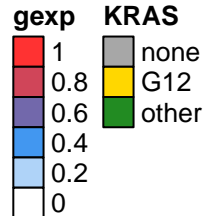

## GABARAPL2 low

## GABARAPL2 high

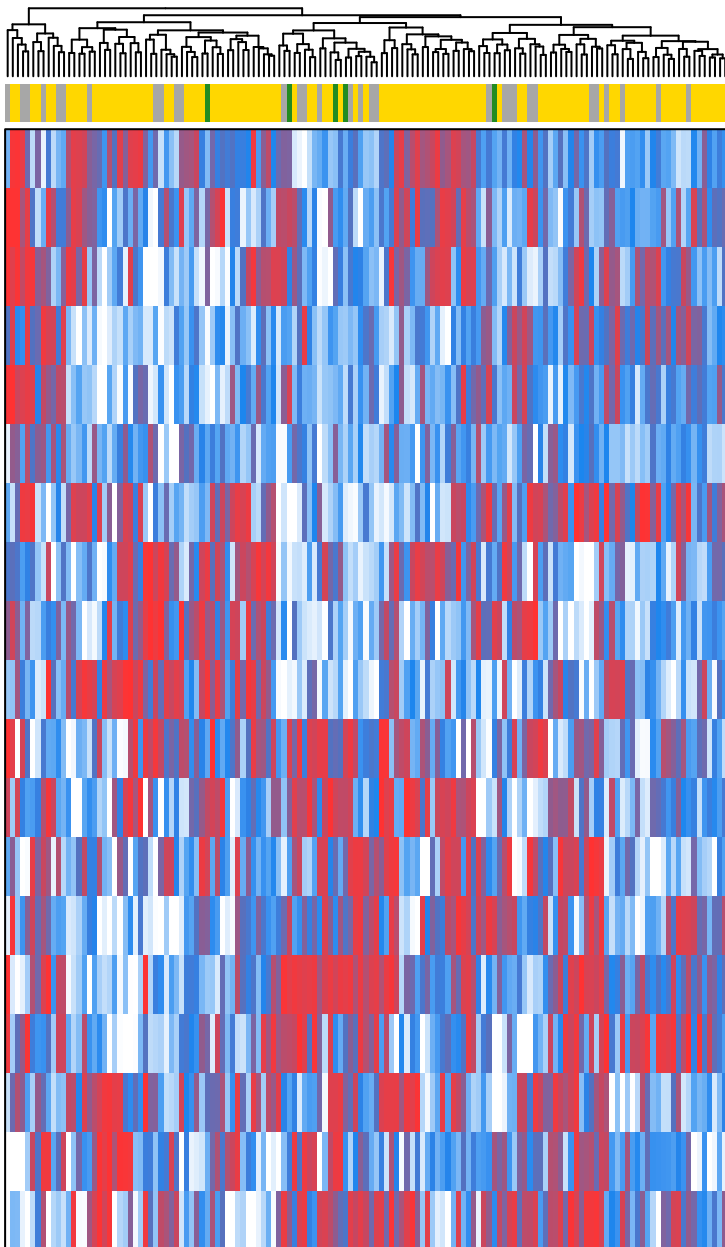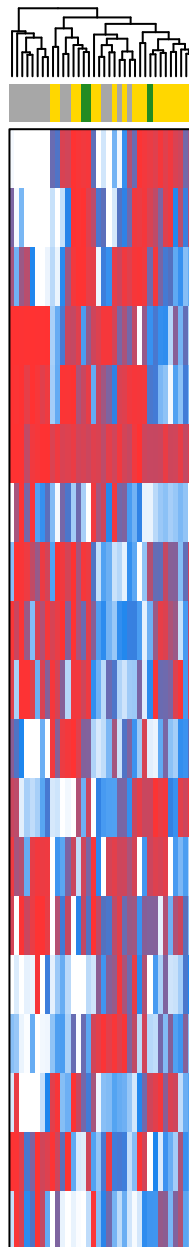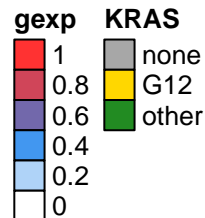

## GABARAPL3 low

## GABARAPL3 high

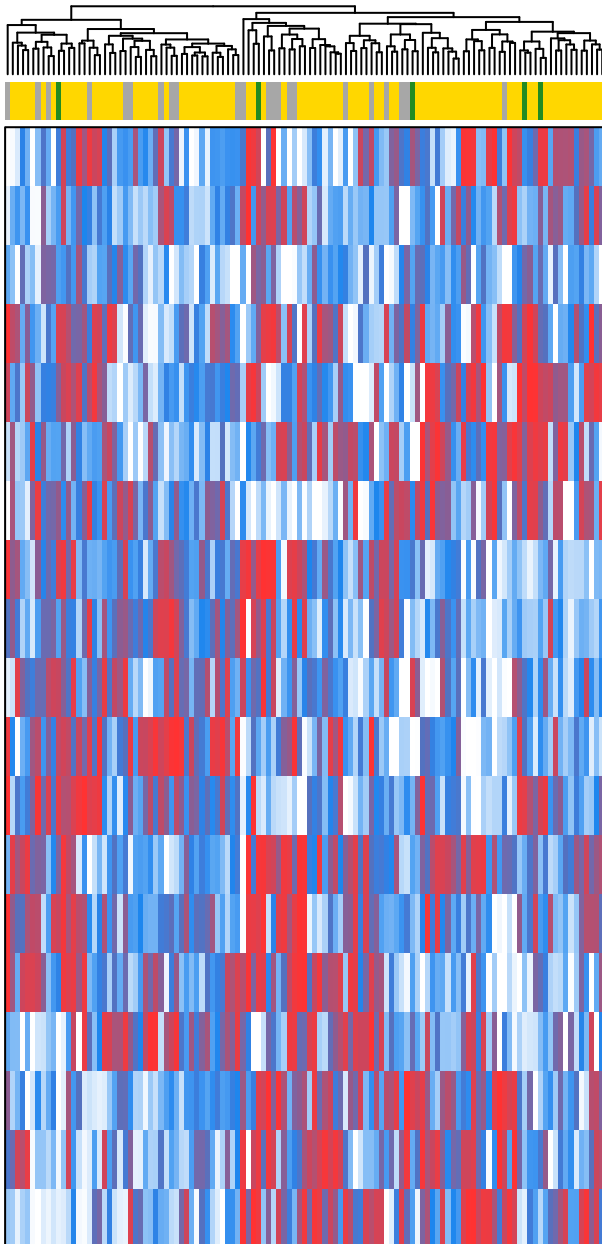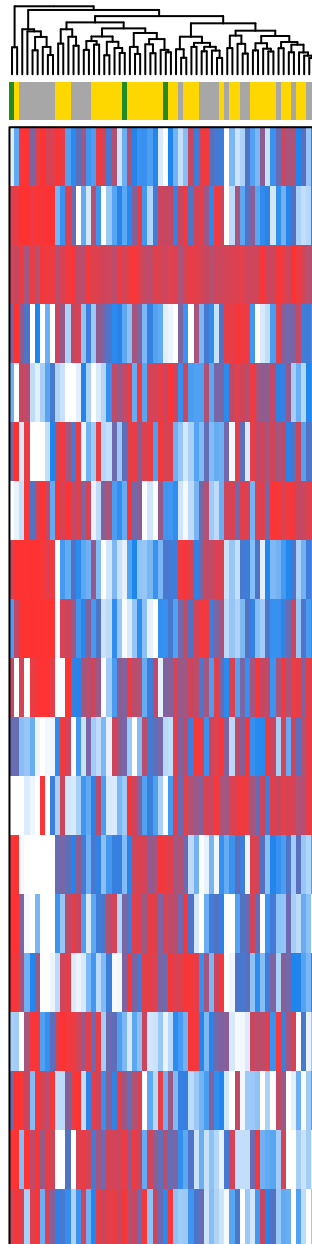

VAMP4

GABARAPL2

GABARAPL3

SNAP29

VAMP3

VTI1A

STX17

GABARAP

VAMP2

GABARAPL1

MAP1LC3C

VAMP7

VAMP8

ATG7

VAMP5

VAMP1

ABCB6

ATG9A

ATG9B

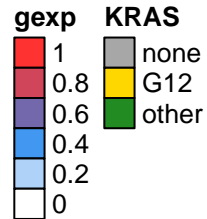

## VAMP8 low

## VAMP8 high

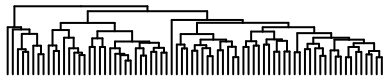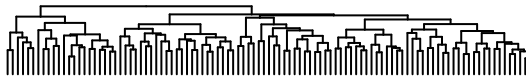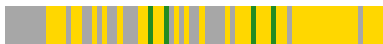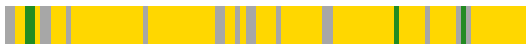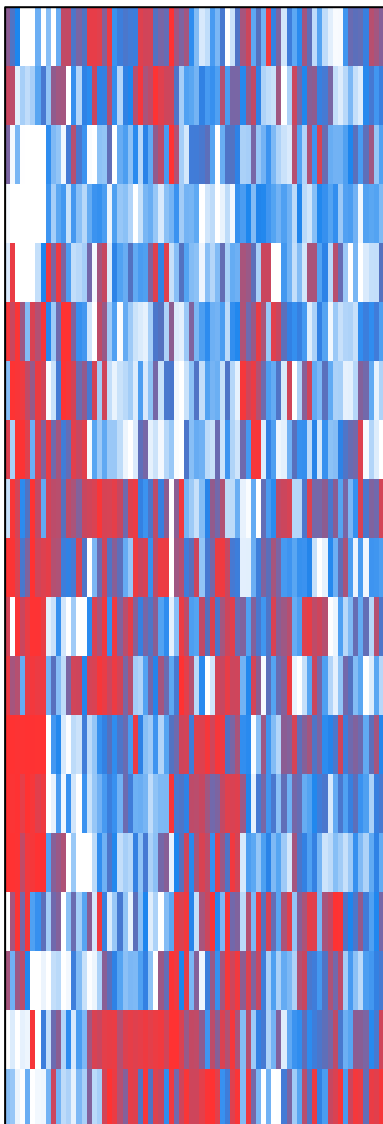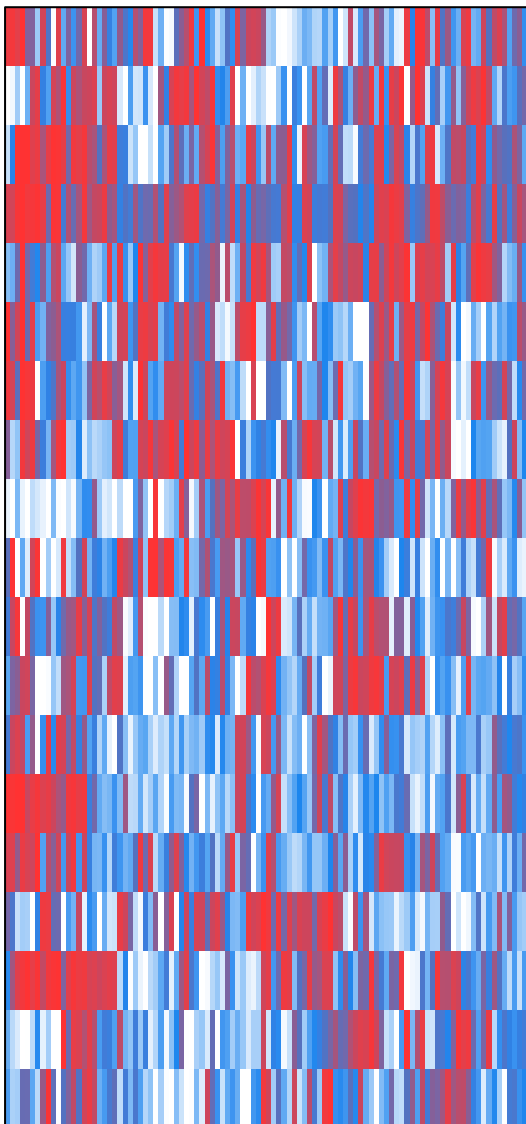

SNAP29

VAMP3

ATG7

VAMP8

VT11A

ABCB6

ATG9A

ATG9B

STX17

VAMP4

GABARAPL1

GABARAPL3

VAMP2

GABARAP

GABARAPL2

VAMP1

VAMP5

VAMP7

MAP1LC3C



### VAMP1 low

### VAMP1 high

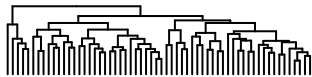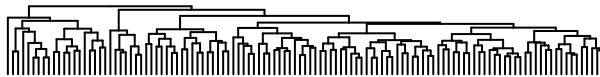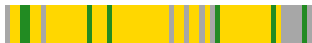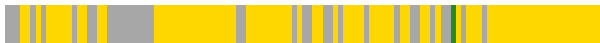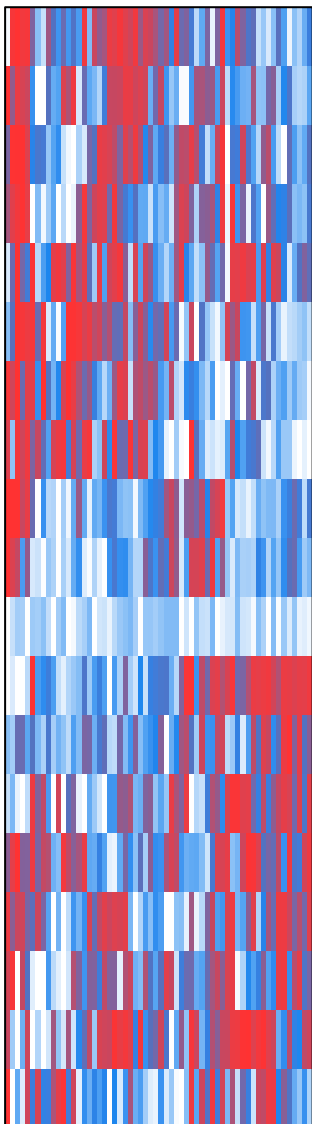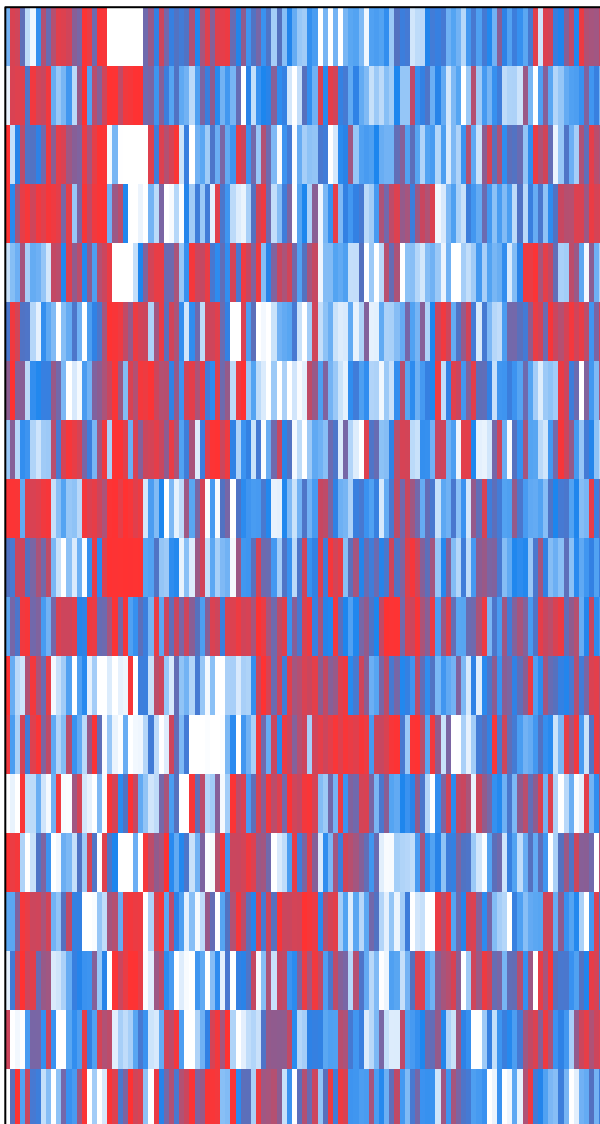

**VAMP8**  
**GABARAPL2**  
**ATG7**  
**VAMP5**  
**VT11A**  
**ATG9A**  
**ABCB6**  
**ATG9B**  
**GABARAP**  
**VAMP2**  
**VAMP1**  
**VAMP7**  
**MAP1LC3C**  
**STX17**  
**SNAP29**  
**GABARAPL3**  
**GABARAPL1**  
**VAMP3**  
**VAMP4**

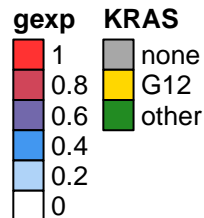

**SNAP29 low****SNAP29 high**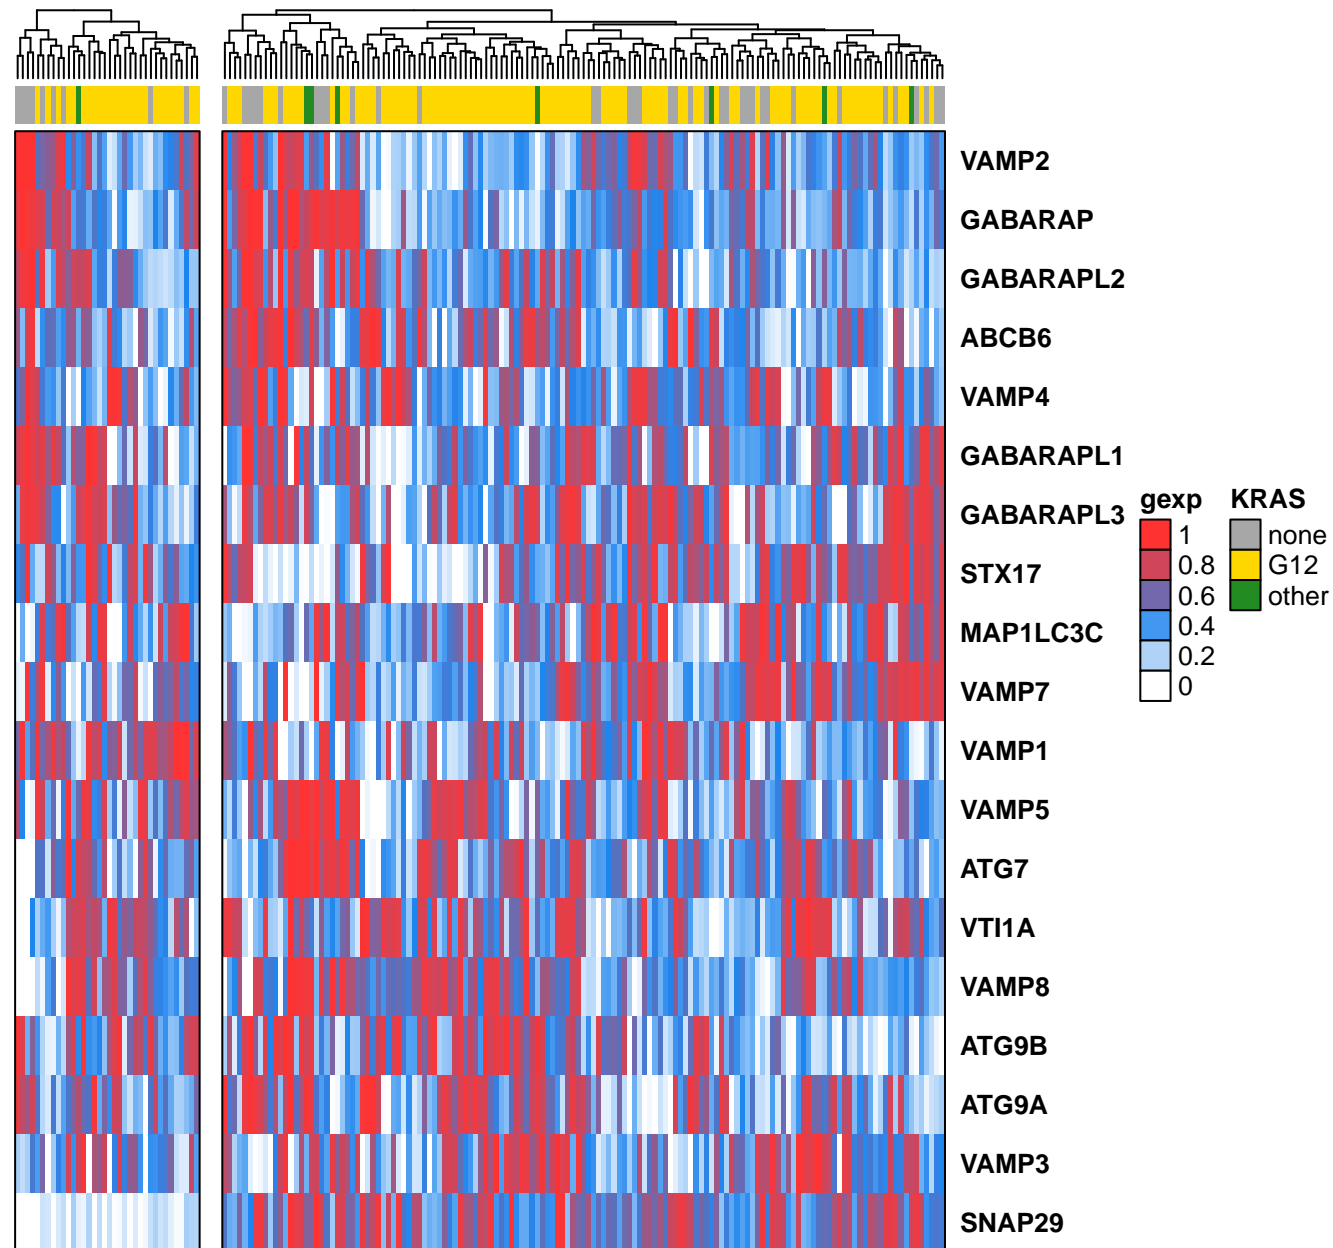



**VAMP7 low****VAMP7 high**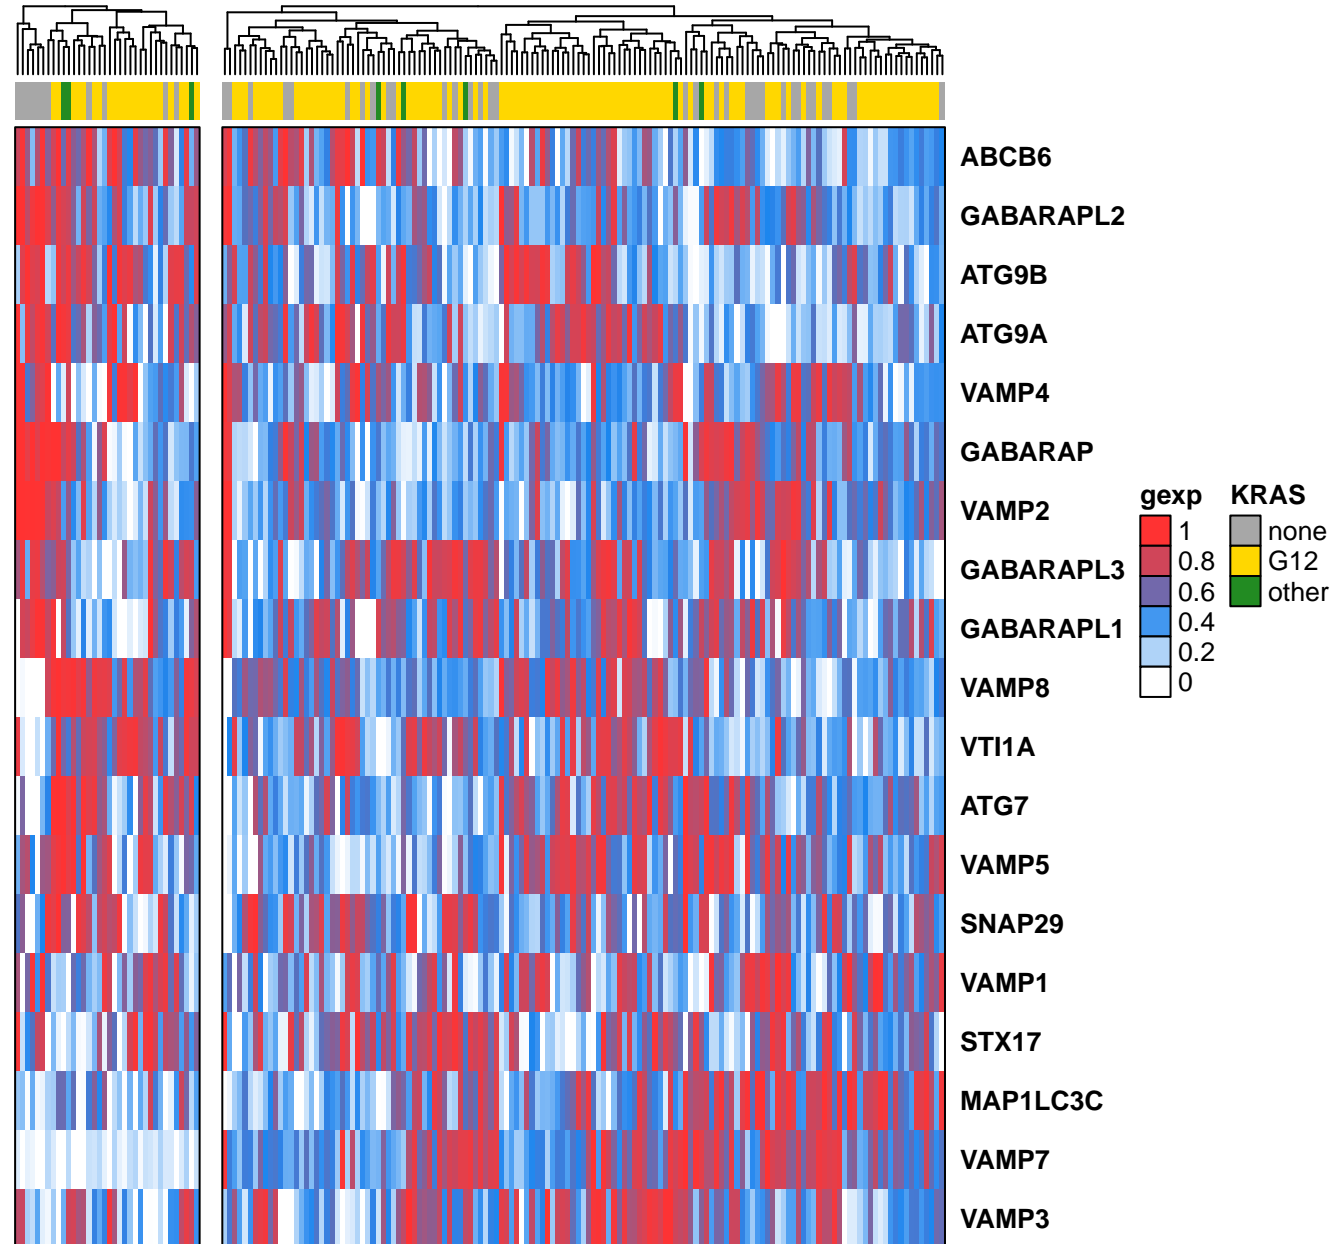

**ATG7 low****ATG7 high**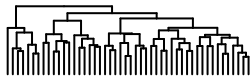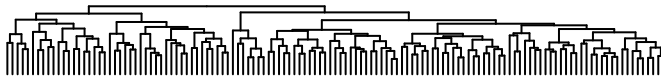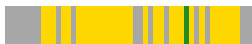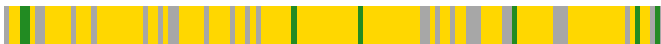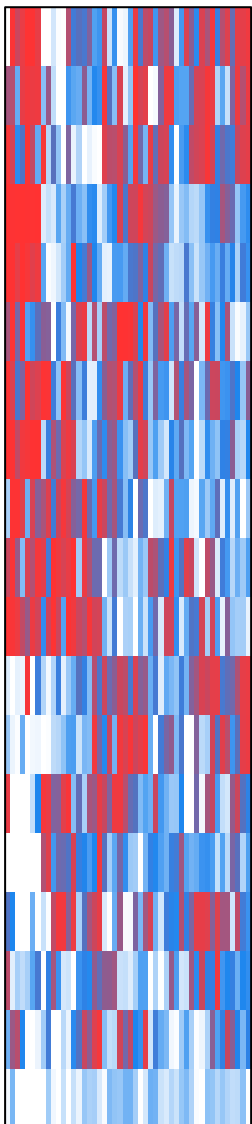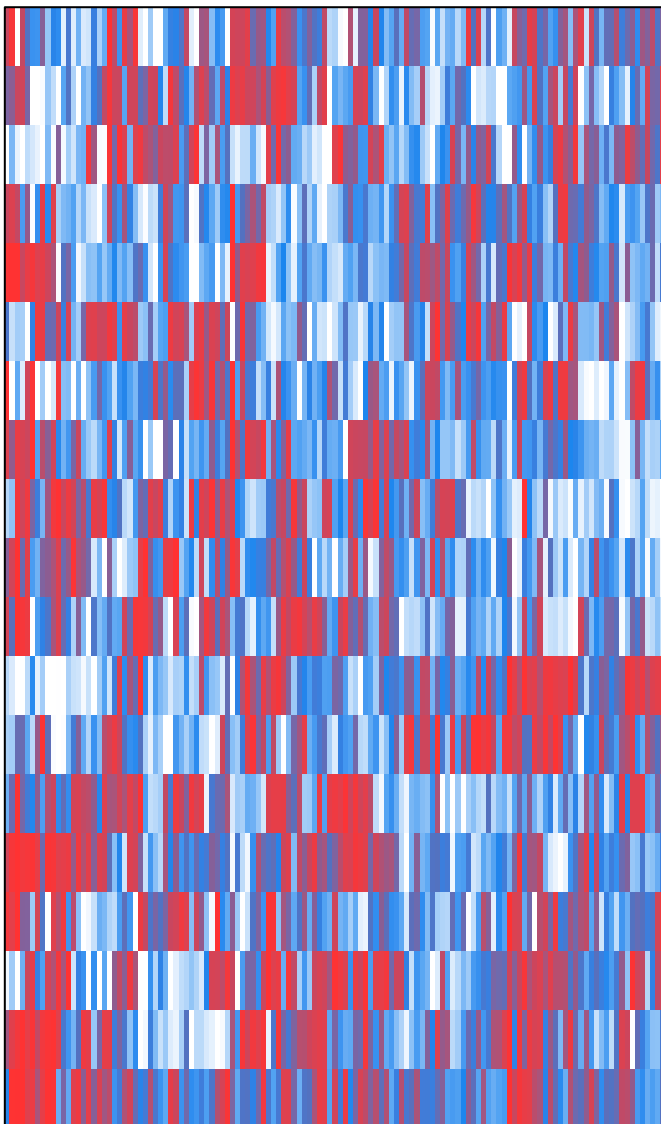

GABARAPL1

GABARAPL3

STX17

VAMP2

GABARAP

VAMP1

VAMP4

GABARAPL2

ATG9B

ABCB6

ATG9A

VAMP7

MAP1LC3C

VT1A

VAMP8

SNAP29

VAMP3

VAMP5

ATG7

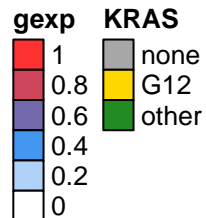

## GABARAPL1 low

## GABARAPL1 high

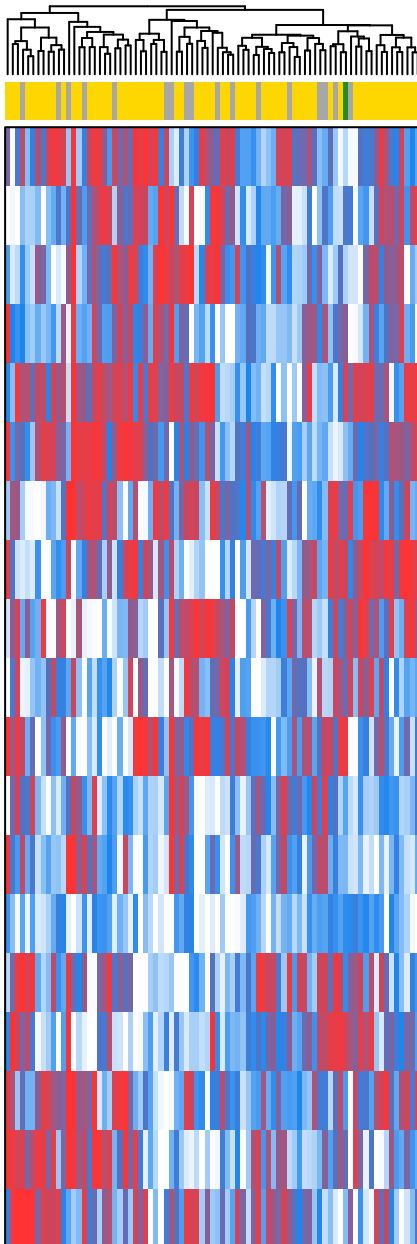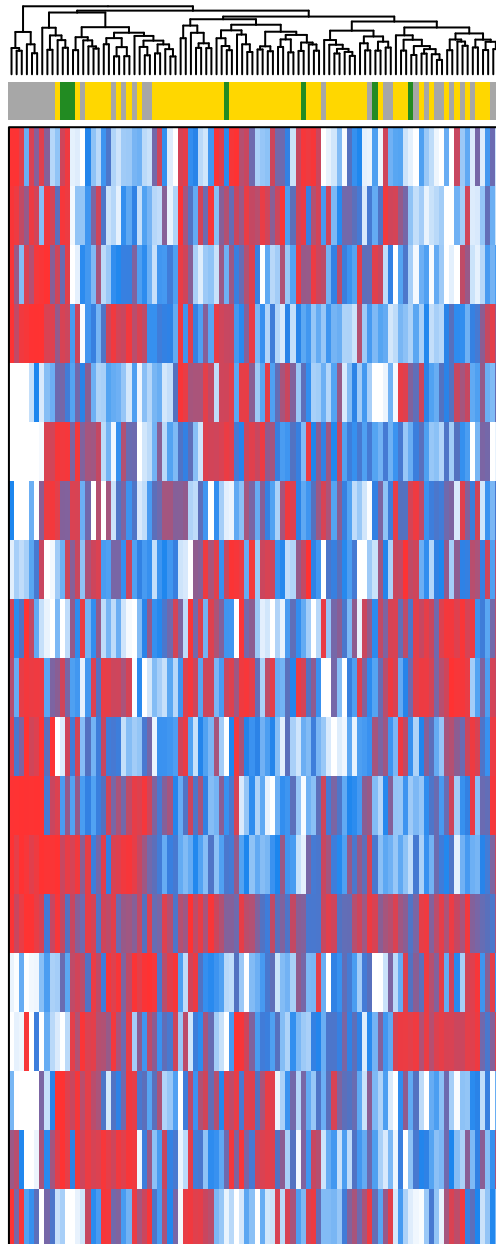

ATG9B

ATG9A

ABCB6

GABARAPL2

VT11A

VAMP8

SNAP29

VAMP3

STX17

GABARAPL3

VAMP4

VAMP2

GABARAP

GABARAPL1

MAP1LC3C

VAMP7

ATG7

VAMP5

VAMP1

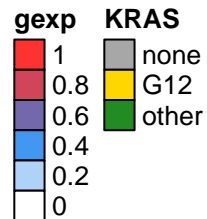

**ATG9B low****ATG9B high**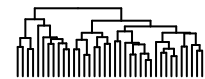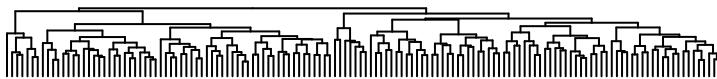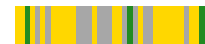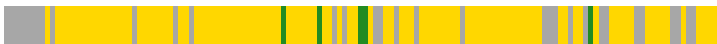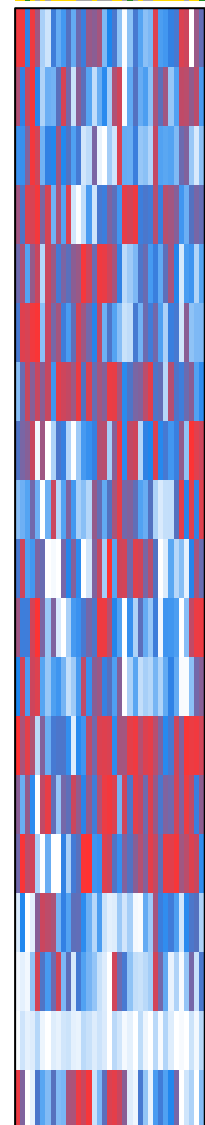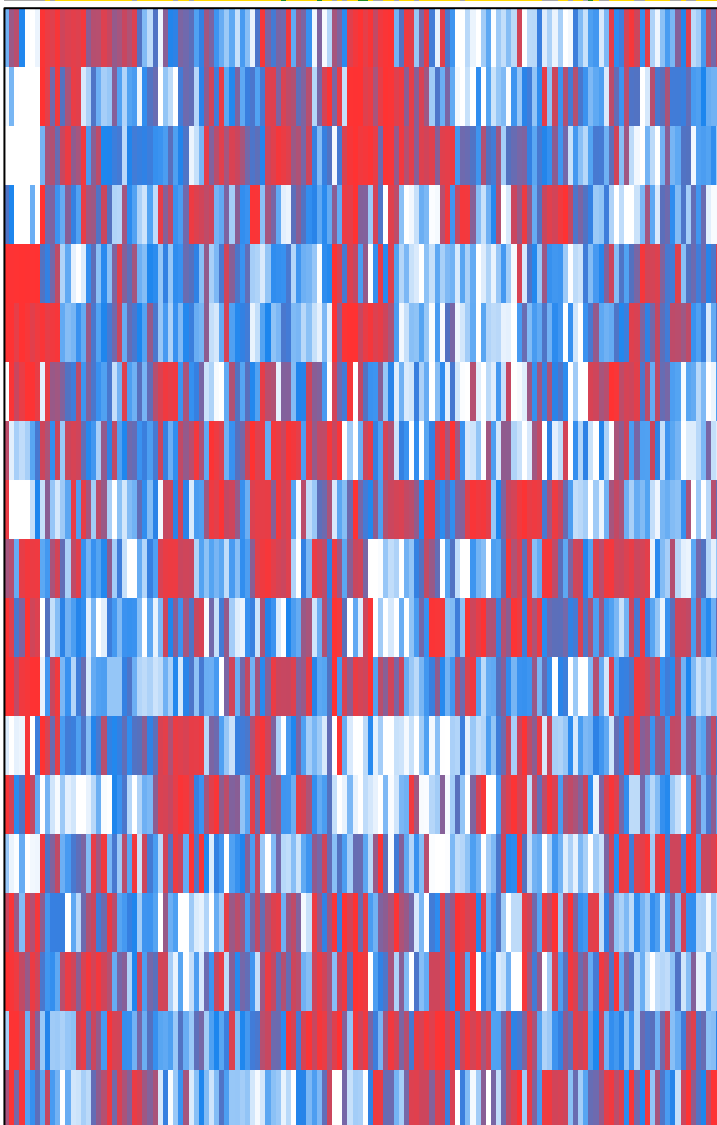

VAMP5

ATG7

VAMP8

SNAP29

VAMP2

GABARAP

GABARAPL1

VAMP3

VTI1A

GABARAPL3

VAMP4

GABARAPL2

VAMP7

STX17

MAP1LC3C

ABCB6

ATG9A

ATG9B

VAMP1



## ATG9A low

## ATG9A high

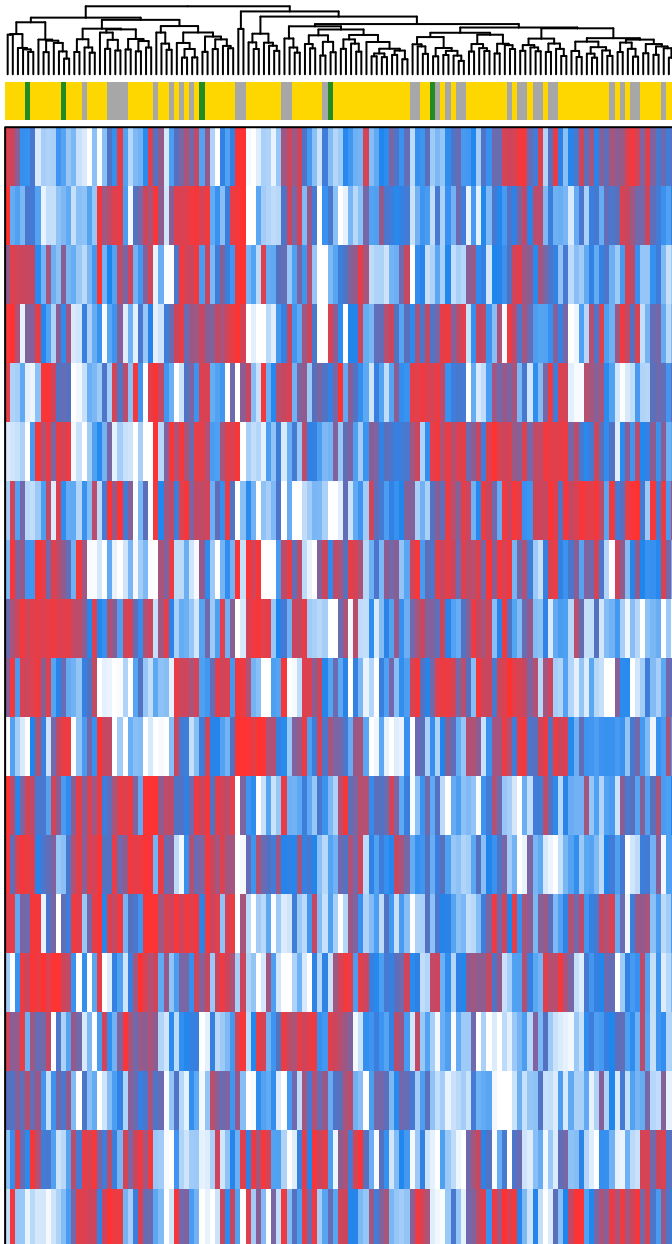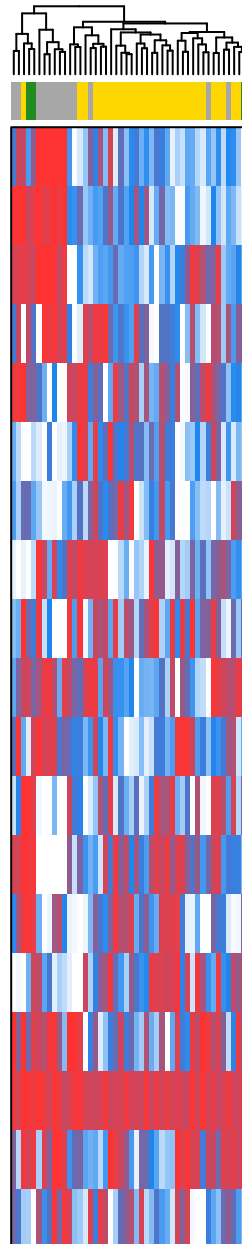

VAMP2

GABARAP

GABARAPL2

GABARAPL1

SNAP29

VAMP7

MAP1LC3C

STX17

VT1A

GABARAPL3

VAMP4

ATG7

VAMP8

VAMP5

VAMP3

ABCB6

ATG9A

ATG9B

VAMP1

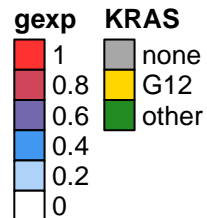

## MAP1LC3C low

## MAP1LC3C high

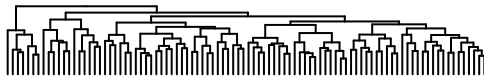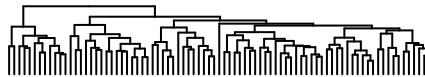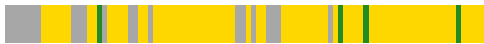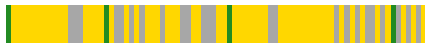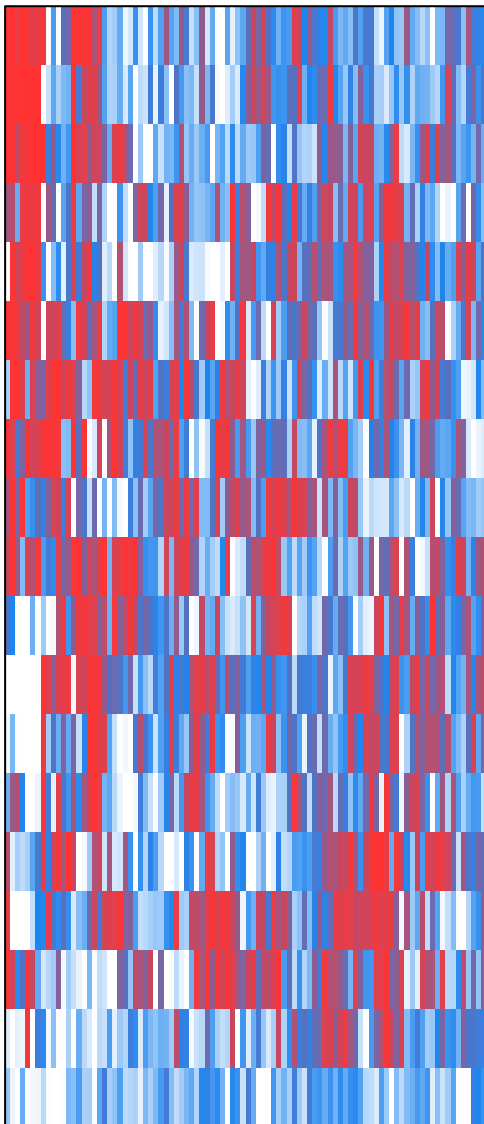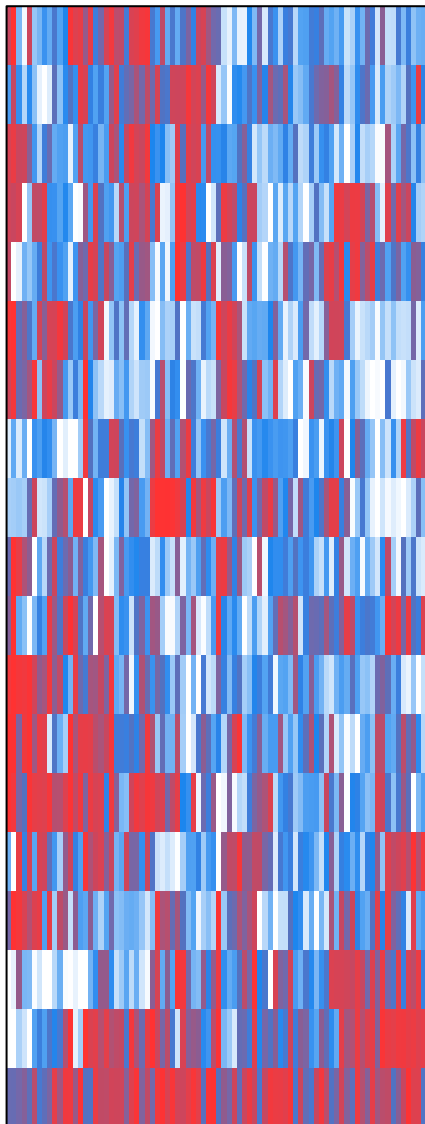

GABARAP

VAMP2

GABARAPL2

GABARAPL3

GABARAPL1

ATG9A

ATG9B

VAMP4

VAMP1

ABCB6

SNAP29

VAMP8

ATG7

VAMP5

VAMP3

VTI1A

STX17

VAMP7

MAP1LC3C



## ABCB6 low

## ABCB6 high

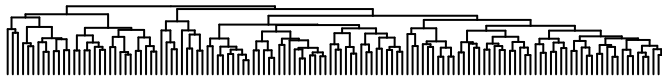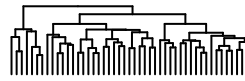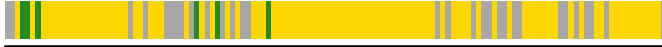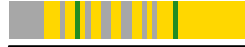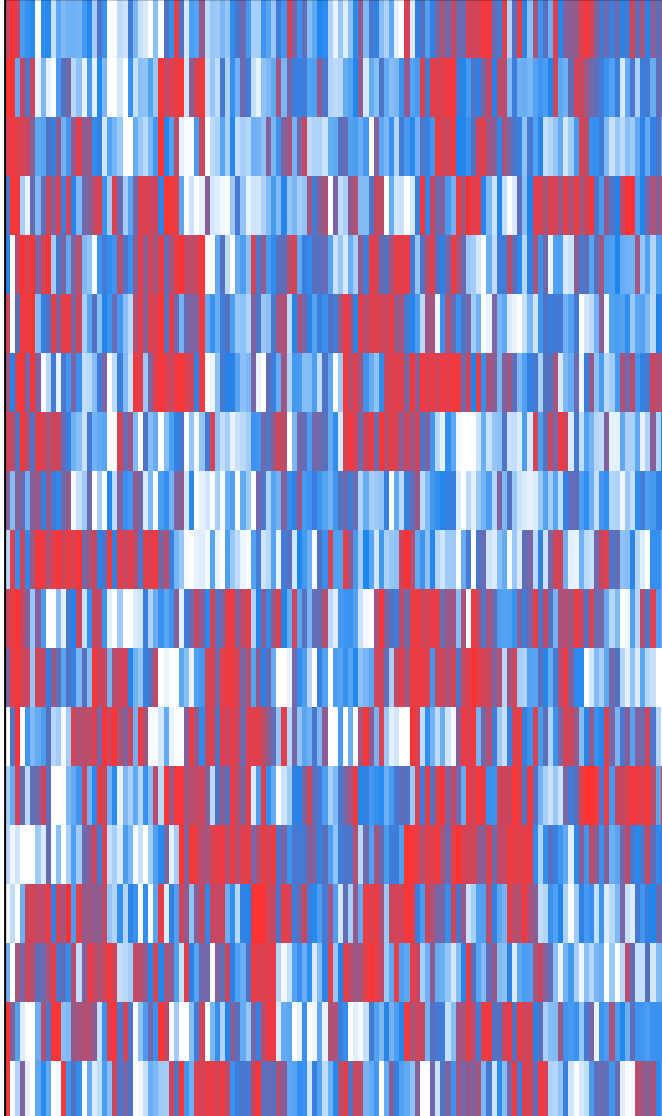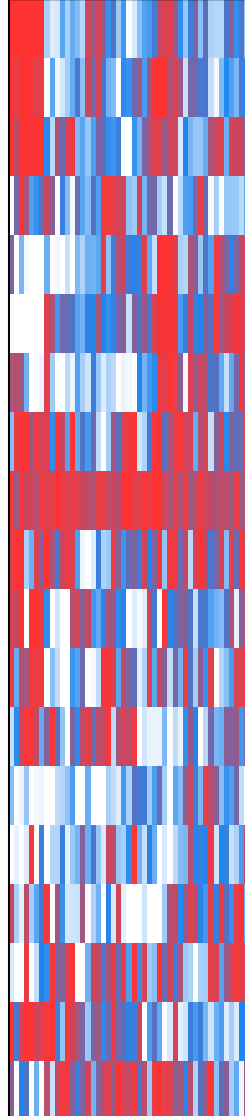

**VAMP2**  
**GABARAP**  
**GABARAPL2**  
**VAMP1**  
**ATG7**  
**VAMP8**  
**VAMP5**  
**ATG9A**  
**ABCB6**  
**ATG9B**  
**GABARAPL1**  
**GABARAPL3**  
**STX17**  
**MAP1LC3C**  
**VAMP7**  
**VAMP3**  
**VT1A**  
**VAMP4**  
**SNAP29**

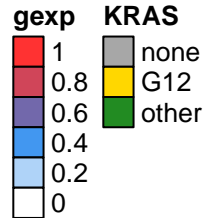

**VT1A low****VT1A high**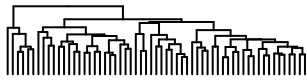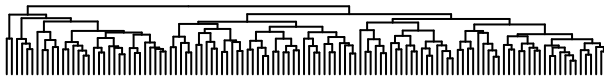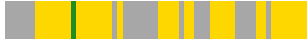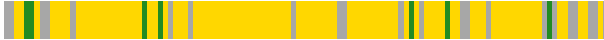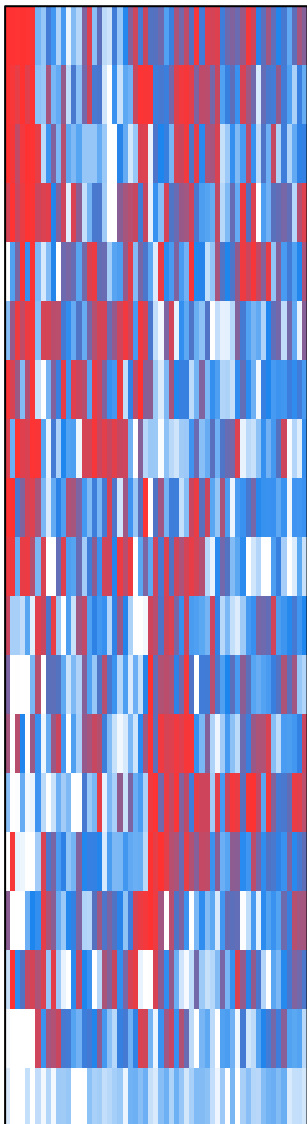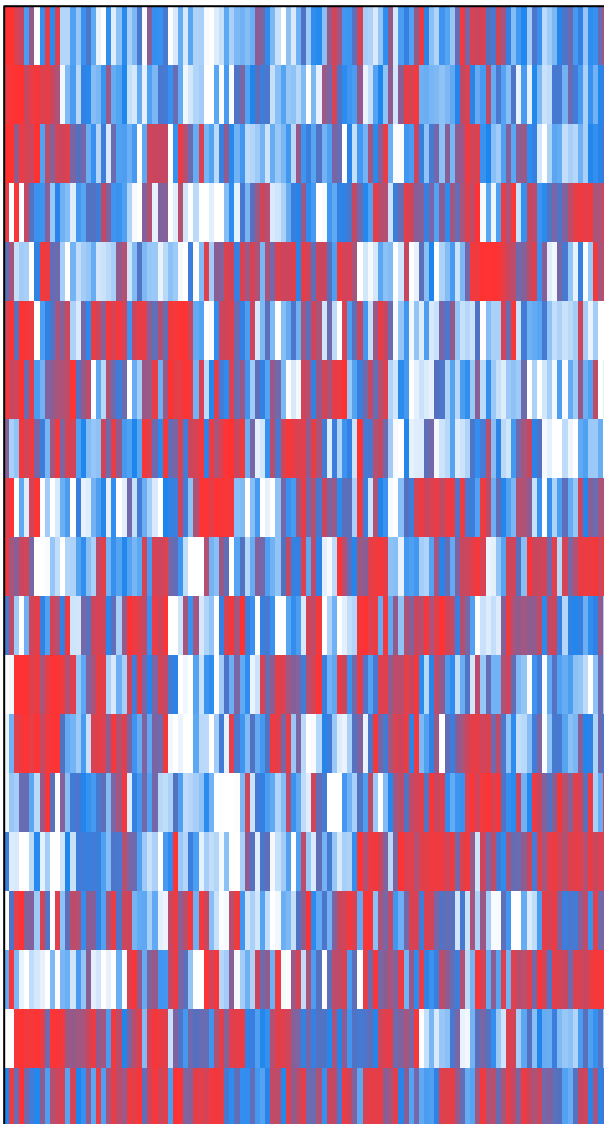

**VAMP2**  
**GABARAP**  
**GABARAPL2**  
**GABARAPL1**  
**VAMP1**  
**ATG9A**  
**ABCB6**  
**ATG9B**  
**VAMP4**  
**GABARAPL3**  
**VAMP3**  
**ATG7**  
**VAMP5**  
**MAP1LC3C**  
**VAMP7**  
**SNAP29**  
**STX17**  
**VAMP8**  
**VT1A**

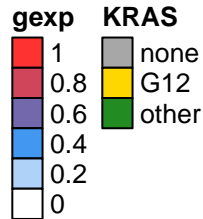



## STX17 low

## STX17 high

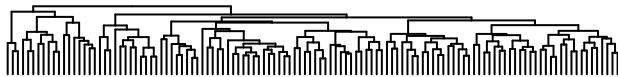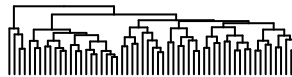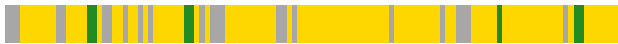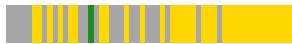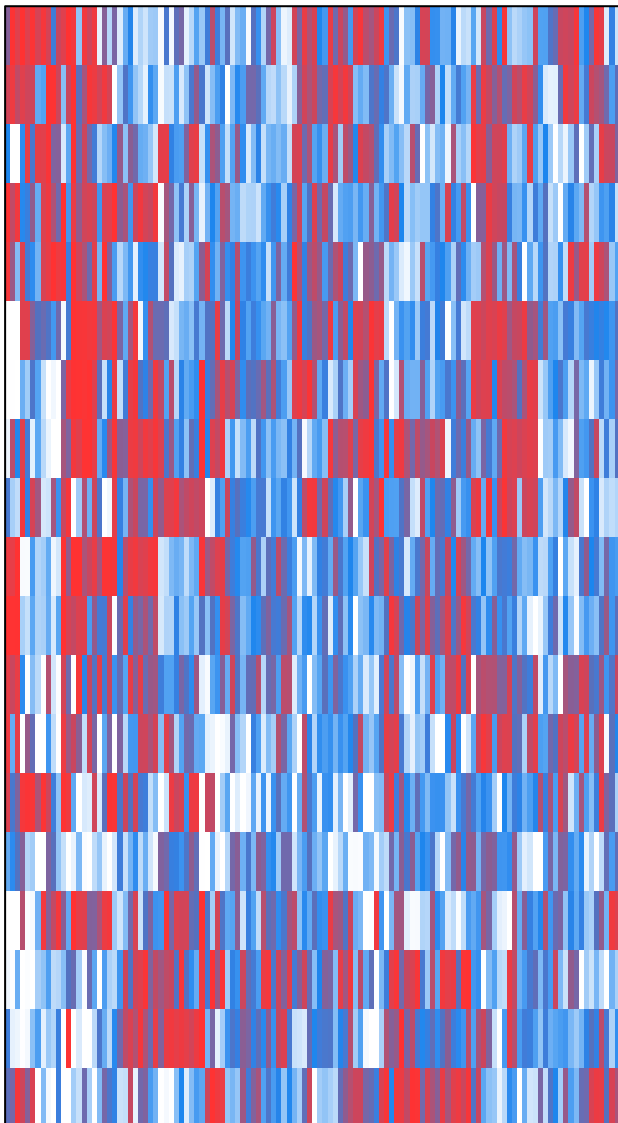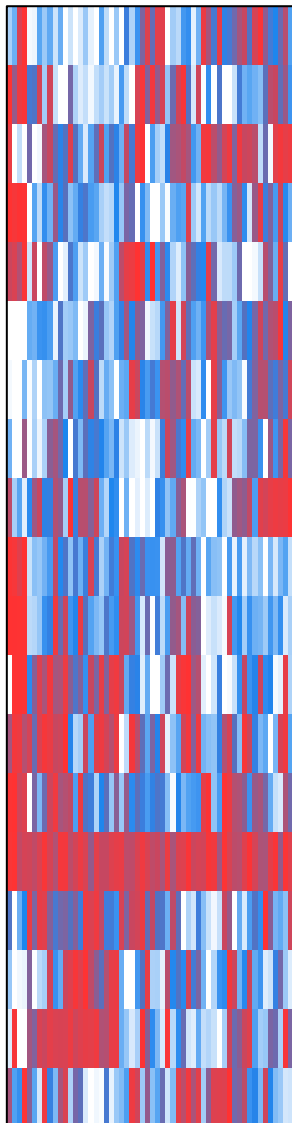

**ATG9B**  
**ATG9A**  
**VTI1A**  
**GABARAPL2**  
**ABCB6**  
**VAMP8**  
**ATG7**  
**VAMP5**  
**VAMP3**  
**GABARAP**  
**VAMP2**  
**GABARAPL1**  
**GABARAPL3**  
**VAMP4**  
**STX17**  
**SNAP29**  
**MAP1LC3C**  
**VAMP7**  
**VAMP1**

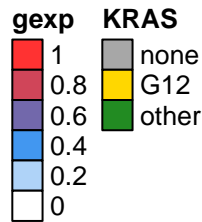

## VAMP5 low

## VAMP5 high

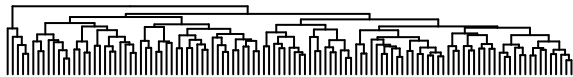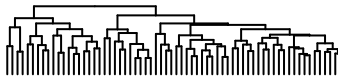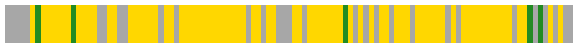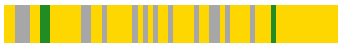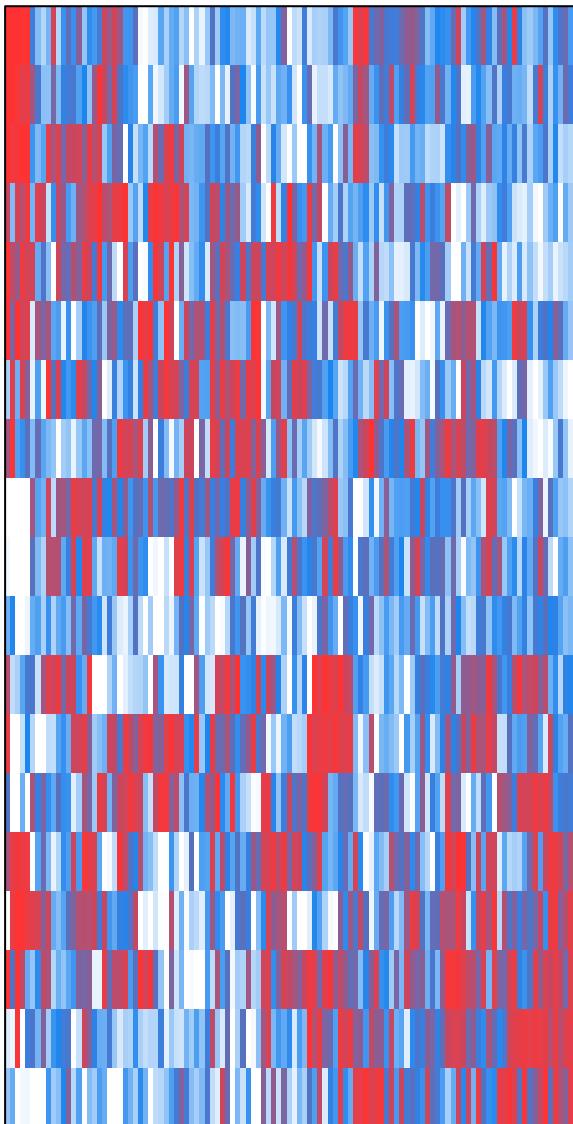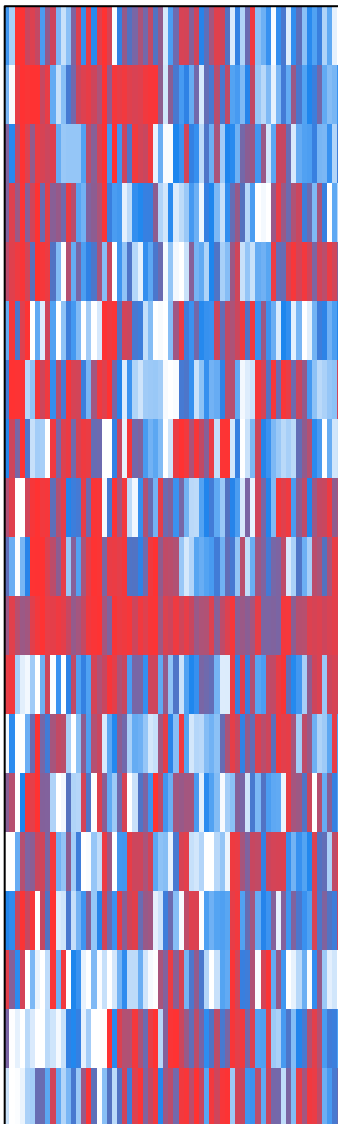

**VAMP2**  
**GABARAP**  
**GABARAPL2**  
**ABCB6**  
**ATG9A**  
**VAMP4**  
**ATG9B**  
**VAMP1**  
**VAMP8**  
**ATG7**  
**VAMP5**  
**VAMP3**  
**VTI1A**  
**SNAP29**  
**GABARAPL3**  
**GABARAPL1**  
**STX17**  
**VAMP7**  
**MAP1LC3C**

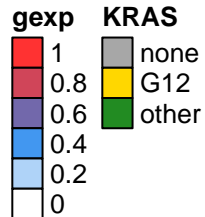

## VAMP4 low

## VAMP4 high

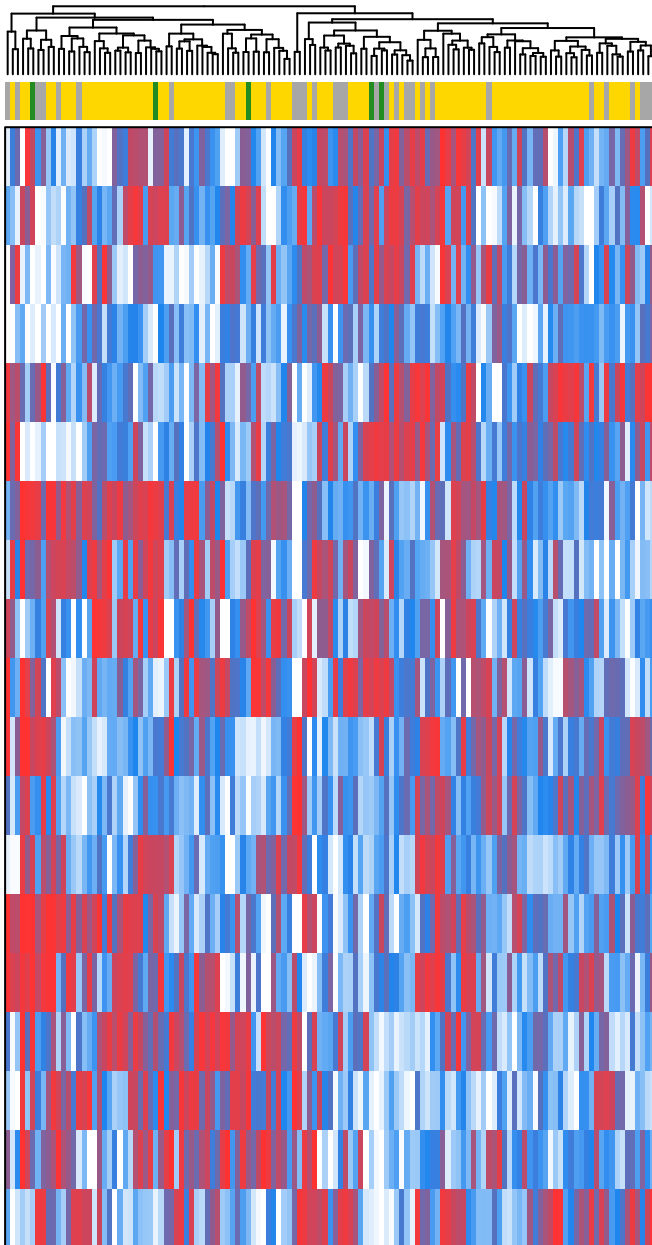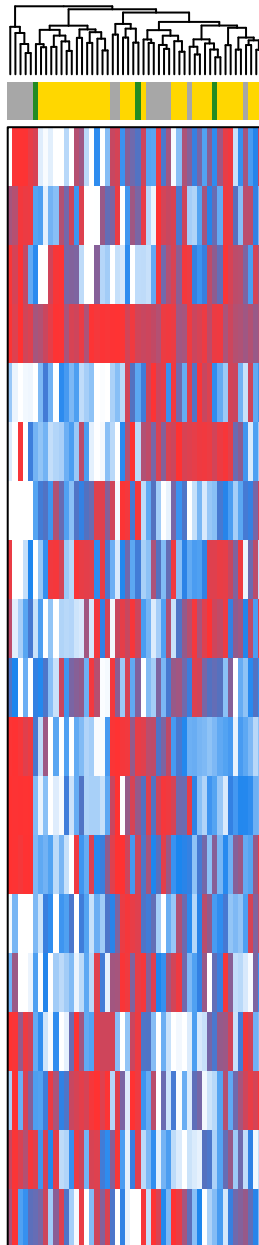

GABARAPL1

GABARAPL3

STX17

VAMP4

MAP1LC3C

VAMP7

VAMP8

VT1A

VAMP3

SNAP29

GABARAP

VAMP2

GABARAPL2

ATG7

VAMP5

ATG9A

ATG9B

ABCB6

VAMP1

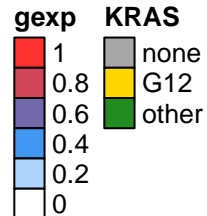

Supplement: onc2017175x3.pdf [file onc2017175x3.pdf]
