# Supplementary material for: Autophagy suppresses Ras-driven epithelial tumourigenesis by limiting the accumulation of reactive oxygen species
Source: PubMed Central journal article supplement (PMC5633656; doi:10.1038/onc.2017.175), 2017-06-05
Supplement: onc2017175x4.pdf [file onc2017175x4.pdf]

VAMP2,PAAD LOG1P SCALED bestcutoff 22%

hazardratio

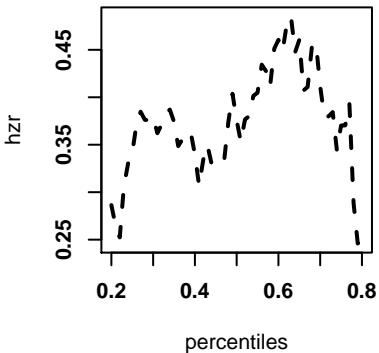

logrank pvalue

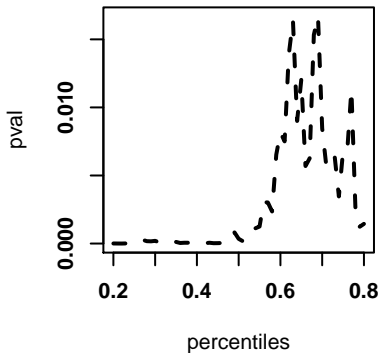

survivalplot

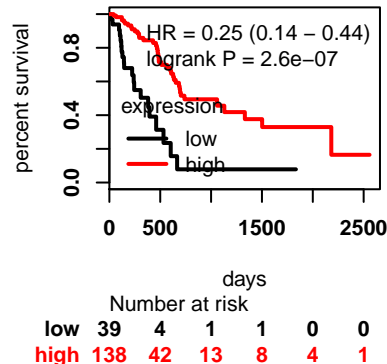

KRAS G12

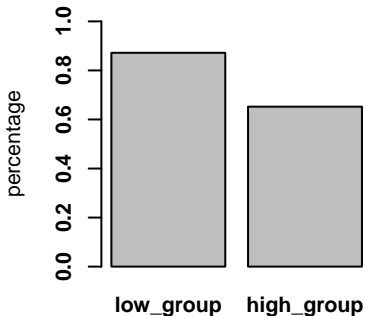

expression

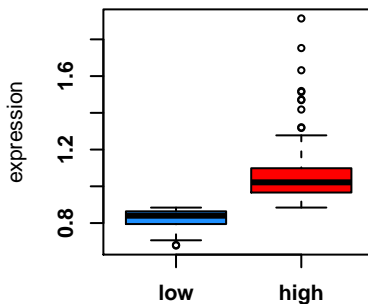

suvaltime

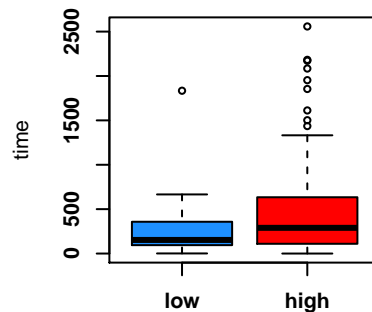

G12 KRAS greater

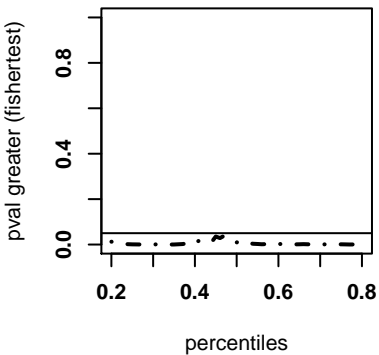

G12 KRAS less

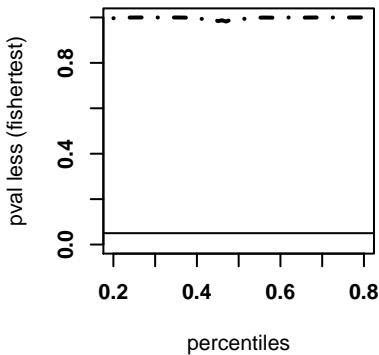

|           | G12      | none/other |
|-----------|----------|------------|
| low       | 34       | 5          |
| high      | 90       | 48         |
| pval_less | 0.9987   |            |
| pval_grea | 0.005248 |            |

GABARAP,PAAD LOG1P SCALED bestcutoff 49%

hazardratio

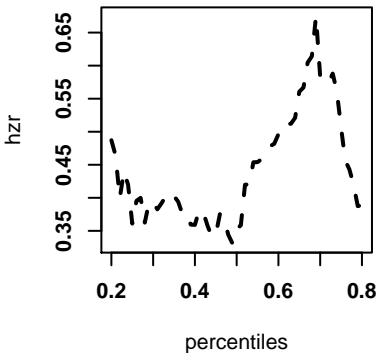

logrank pvalue

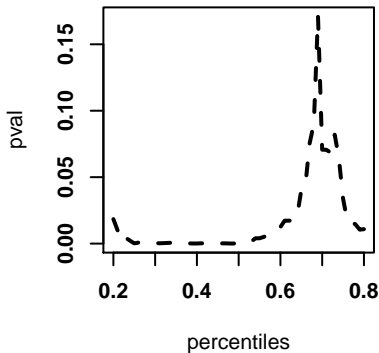

survivalplot

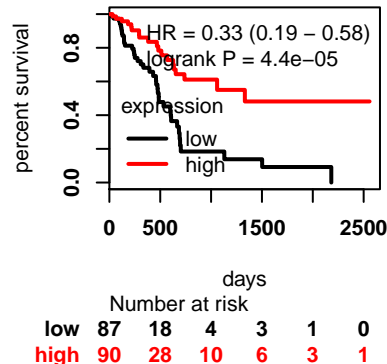

KRAS G12

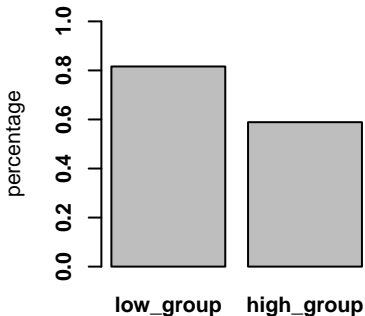

expression

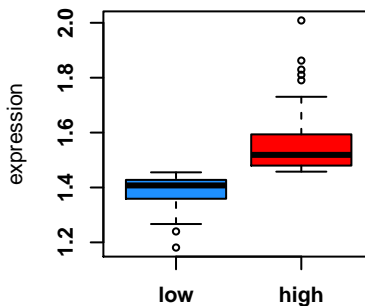

suvaltime

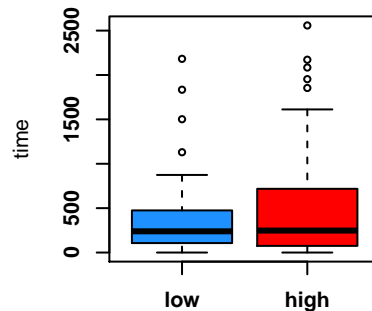

G12 KRAS greater

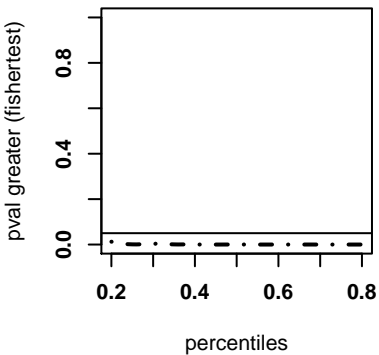

G12 KRAS less

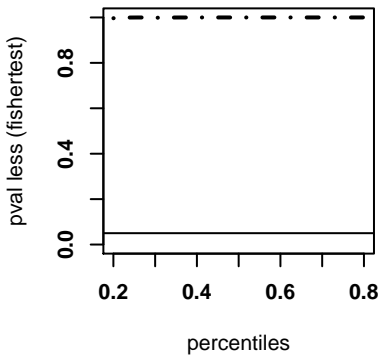

|           | G12      | none/other |
|-----------|----------|------------|
| low       | 71       | 16         |
| high      | 53       | 37         |
| pval_less | 0.9998   |            |
| pval_grea | 0.000781 |            |

VAMP3,PAAD LOG1P SCALED bestcutoff 64%

hazardratio

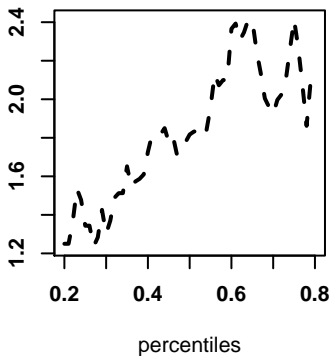

logrank pvalue

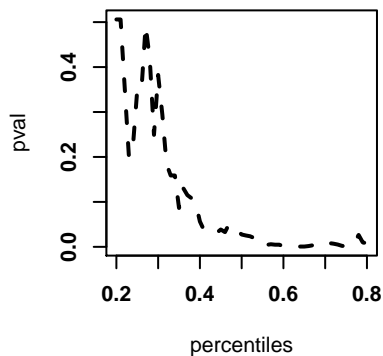

survivalplot

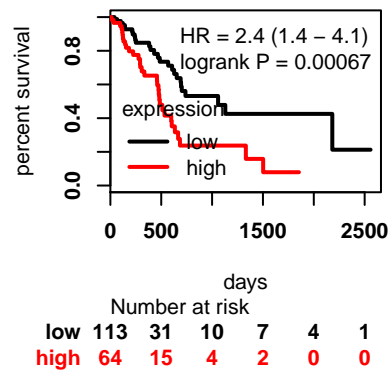

KRAS G12

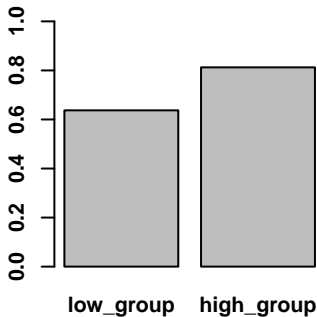

expression

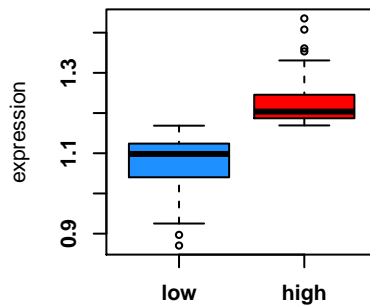

suvaltime

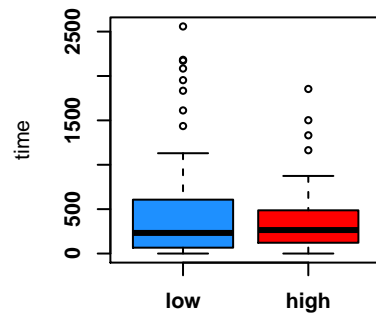

G12 KRAS greater

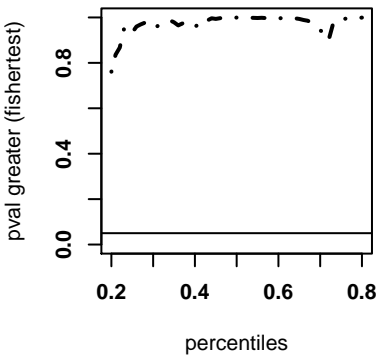

G12 KRAS less

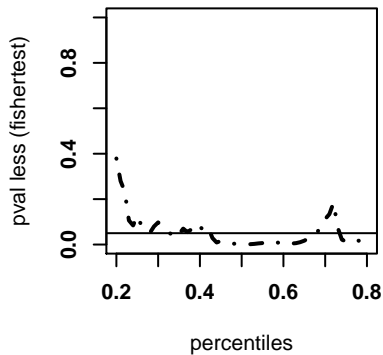

|           | G12     | none/other |
|-----------|---------|------------|
| low       | 72      | 41         |
| high      | 52      | 12         |
| pval_less | 0.01031 |            |
| pval_grea | 0.9963  |            |

GABARAPL2,PAAD LOG1P SCALED bestcutoff 80%

hazardratio

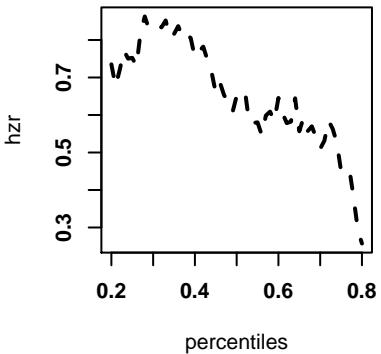

logrank pvalue

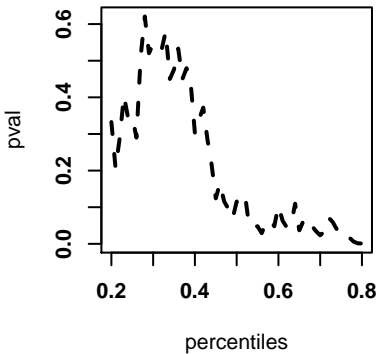

survivalplot

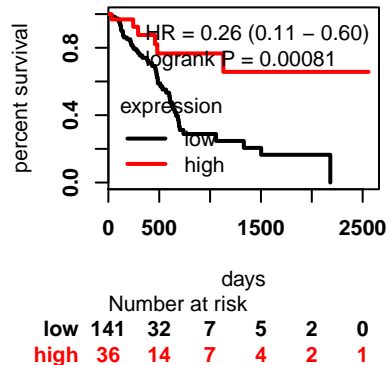

KRAS G12

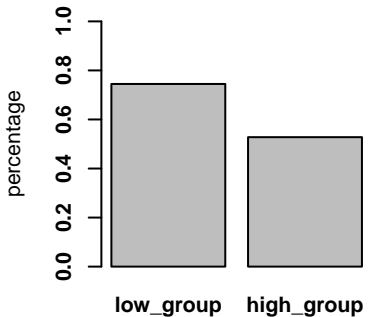

expression

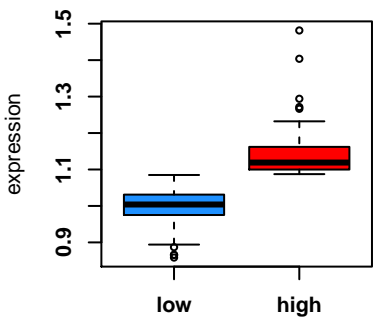

suivalttime

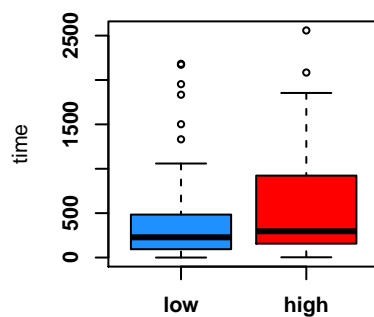

G12 KRAS greater

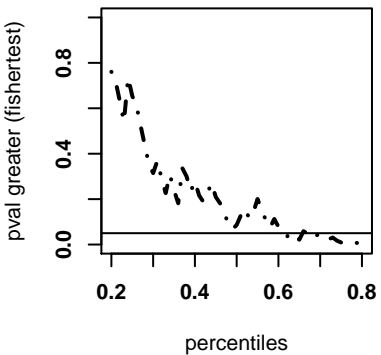

G12 KRAS less

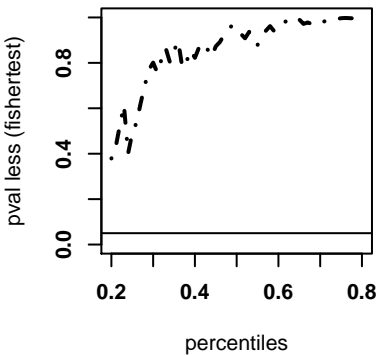

|           | G12     | none/other |
|-----------|---------|------------|
| low       | 105     | 36         |
| high      | 19      | 17         |
| pval_less | 0.9962  |            |
| pval_grea | 0.01124 |            |

GABARAPL3,PAAD LOG1P SCALED bestcutoff 66%

hazardratio

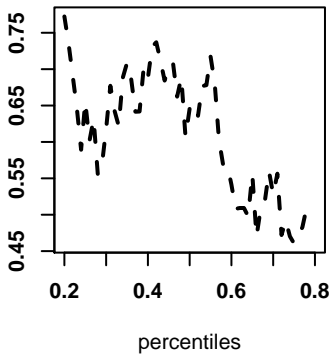

logrank pvalue

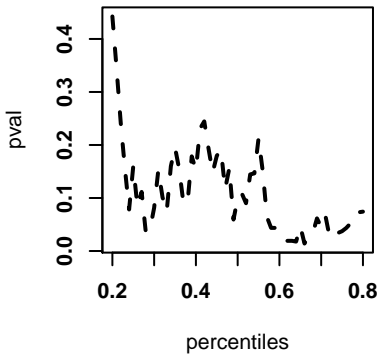

survivalplot

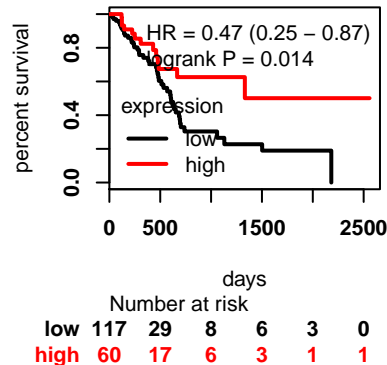

KRAS G12

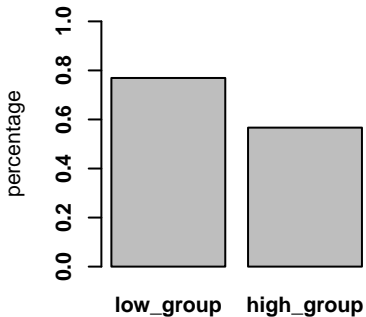

expression

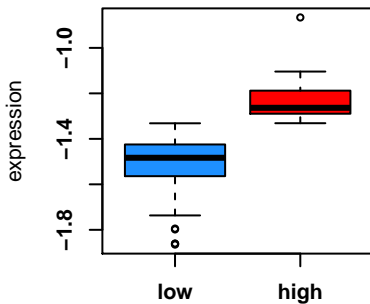

suivalttime

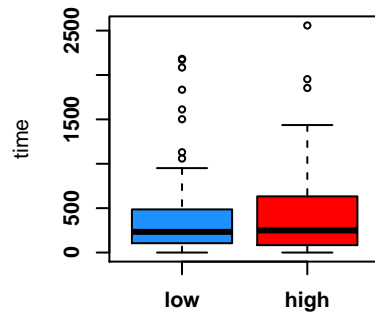

G12 KRAS greater

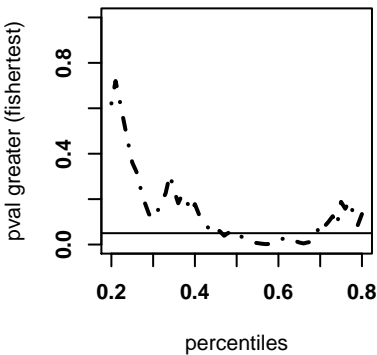

G12 KRAS less

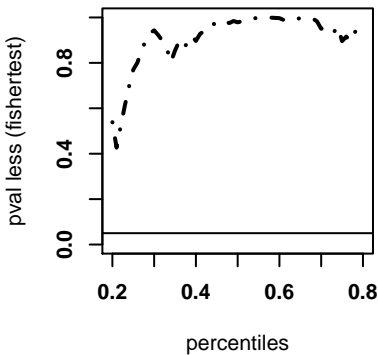

|           | G12      | none/other |
|-----------|----------|------------|
| low       | 90       | 27         |
| high      | 34       | 26         |
| pval_less | 0.9983   |            |
| pval_grea | 0.004878 |            |

VAMP8,PAAD LOG1P SCALED bestcutoff 42%

hazardratio

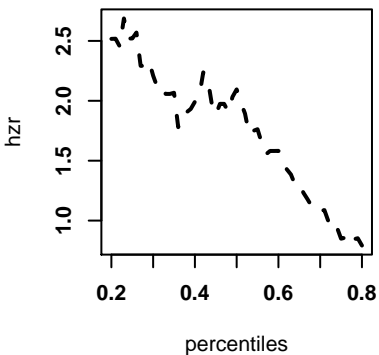

logrank pvalue

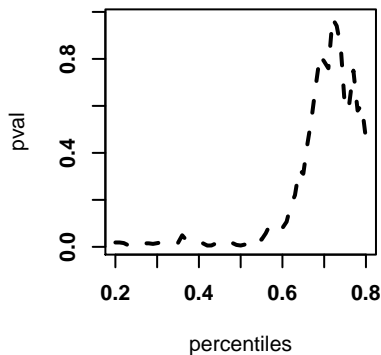

survivalplot

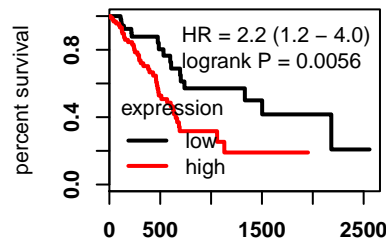

Number at risk

|      | 0   | 500 | 1000 | 1500 | 2000 | 2500 |
|------|-----|-----|------|------|------|------|
| low  | 74  | 21  | 9    | 6    | 4    | 1    |
| high | 103 | 25  | 5    | 3    | 0    | 0    |

KRAS G12

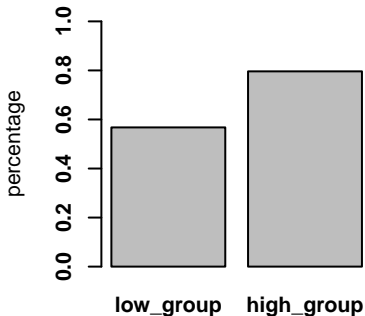

expression

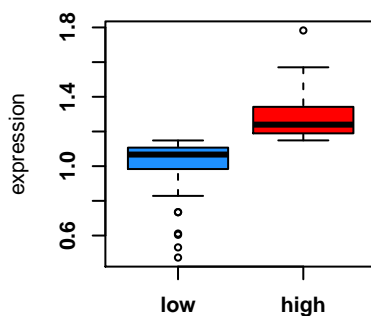

suivaltime

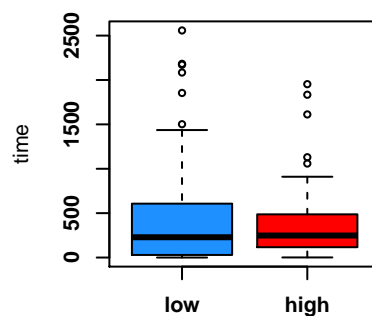

G12 KRAS greater

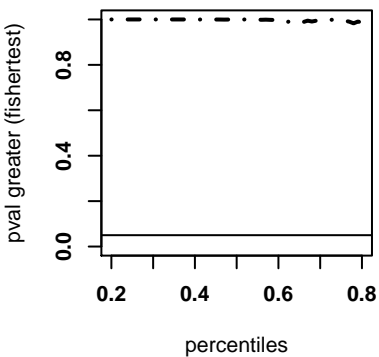

G12 KRAS less

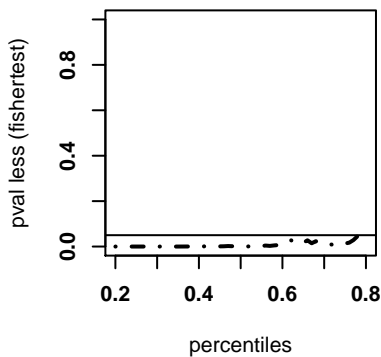

|           | G12       | none/other |
|-----------|-----------|------------|
| low       | 42        | 32         |
| high      | 82        | 21         |
| pval_less | 0.0009688 |            |
| pval_grea | 0.9997    |            |

VAMP1,PAAD LOG1P SCALED bestcutoff 34%

hazardratio

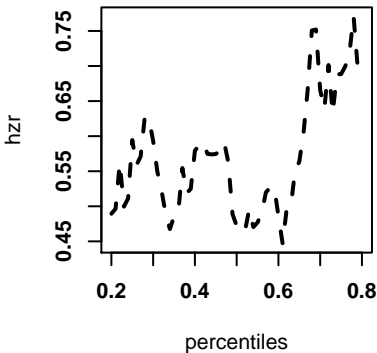

logrank pvalue

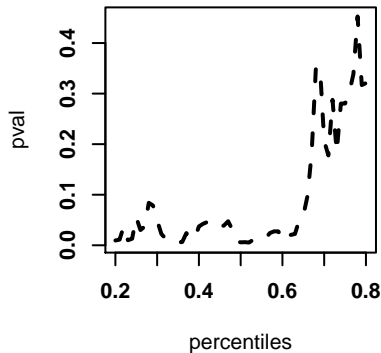

survivalplot

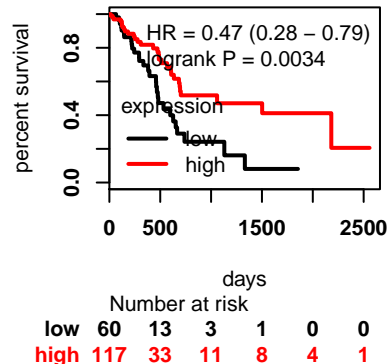

KRAS G12

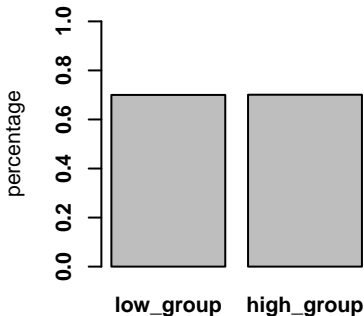

expression

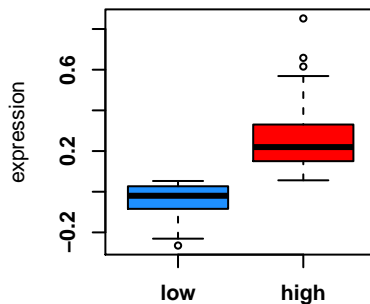

suvaltime

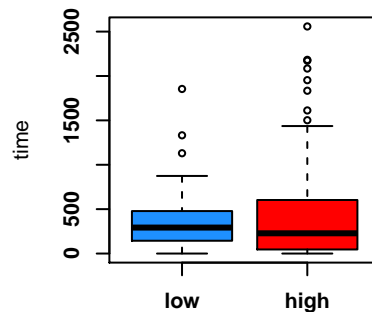

G12 KRAS greater

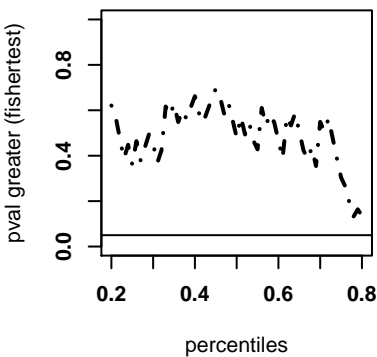

G12 KRAS less

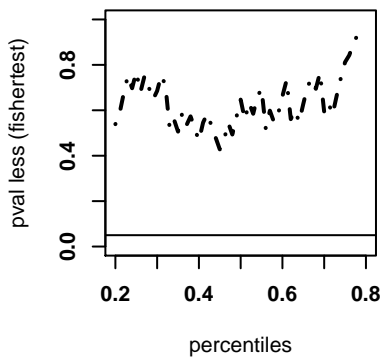

|           | G12    | none/other |
|-----------|--------|------------|
| low       | 42     | 18         |
| high      | 82     | 35         |
| pval_less | 0.5612 |            |
| pval_grea | 0.5762 |            |

SNAP29,PAAD LOG1P SCALED bestcutoff 20%

hazardratio

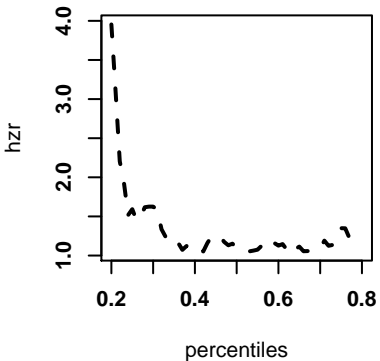

logrank pvalue

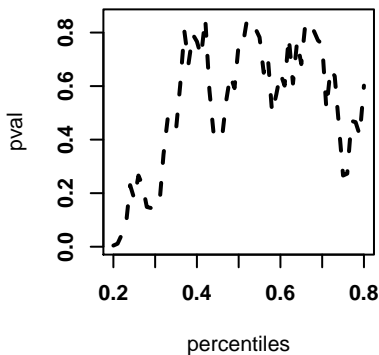

survivalplot

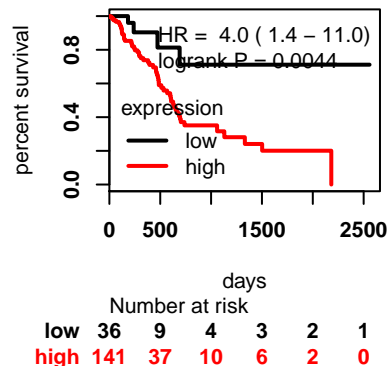

KRAS G12

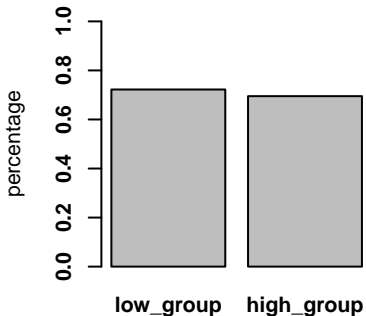

expression

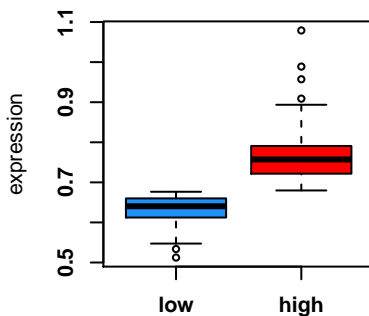

suvaltime

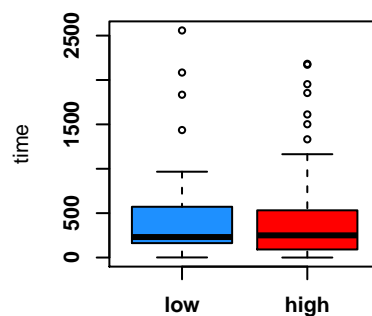

G12 KRAS greater

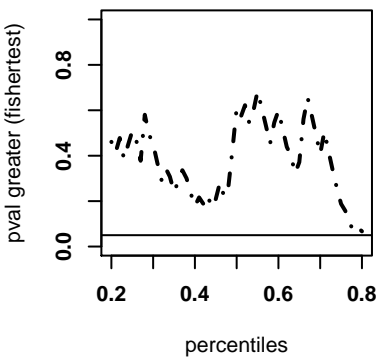

G12 KRAS less

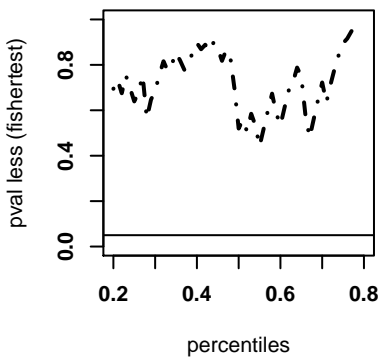

|           | G12    | none/other |
|-----------|--------|------------|
| low       | 26     | 10         |
| high      | 98     | 43         |
| pval_less | 0.6946 |            |
| pval_grea | 0.4612 |            |



VAMP7,PAAD LOG1P SCALED bestcutoff 20%

hazardratio

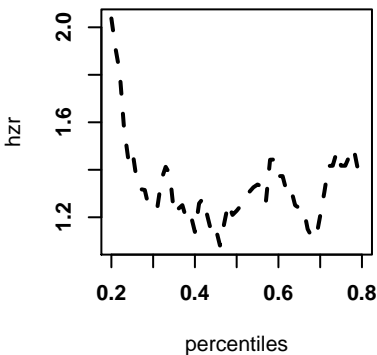

logrank pvalue

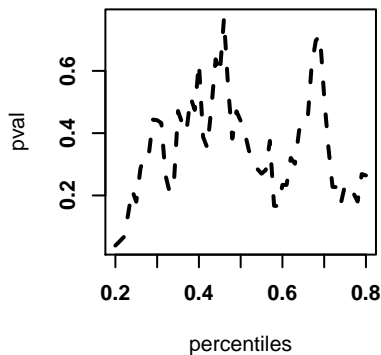

survivalplot

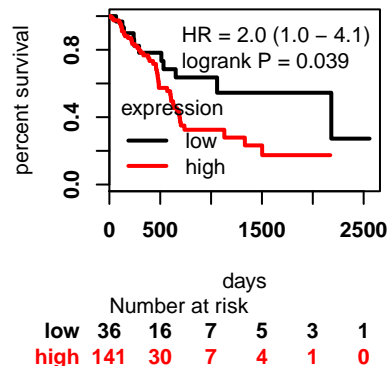

KRAS G12

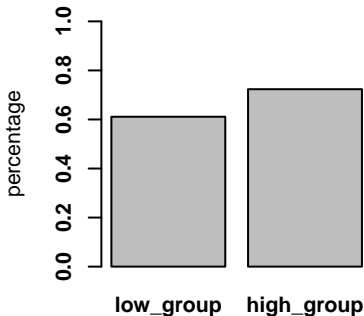

expression

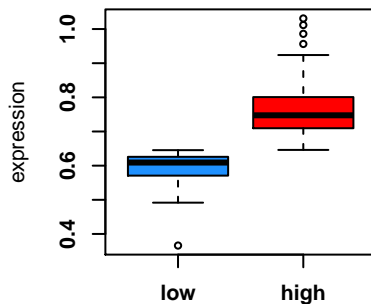

suvaltime

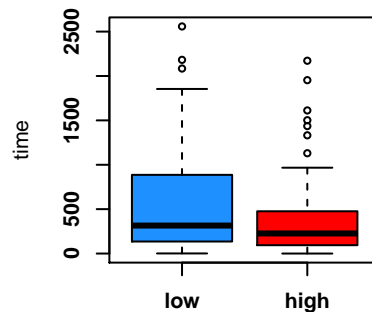

G12 KRAS greater

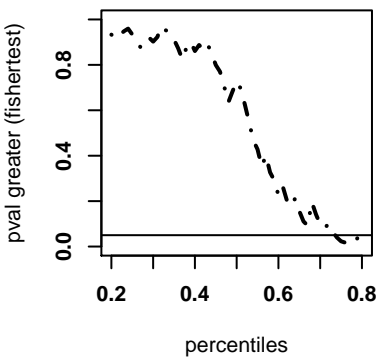

G12 KRAS less

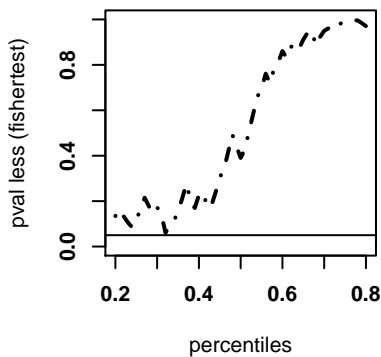

|           | G12    | none/other |
|-----------|--------|------------|
| low       | 22     | 14         |
| high      | 102    | 39         |
| pval_less | 0.1343 |            |
| pval_grea | 0.9333 |            |

ATG7,PAAD LOG1P SCALED bestcutoff 27%

hazardratio

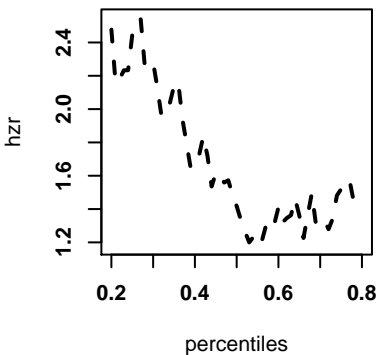

logrank pvalue

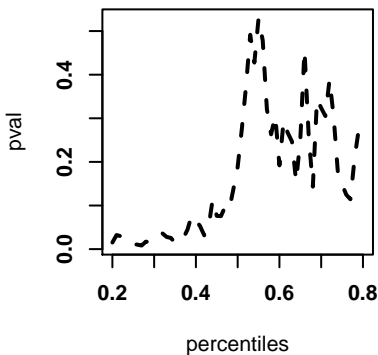

survivalplot

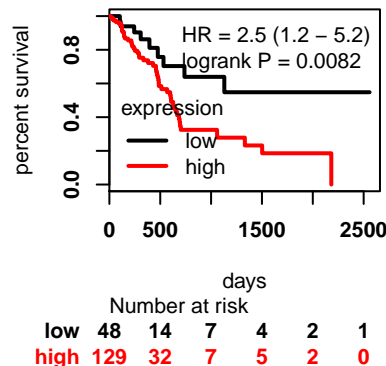

KRAS G12

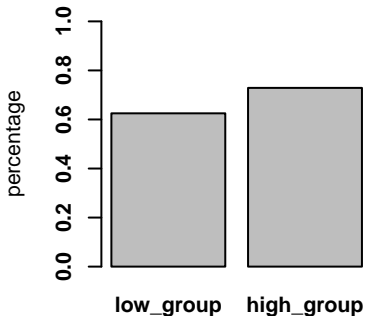

expression

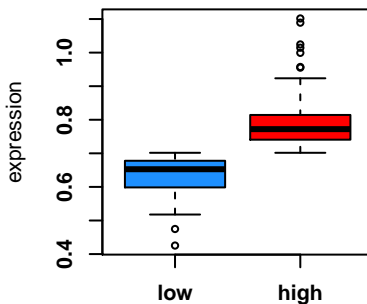

suivalttime

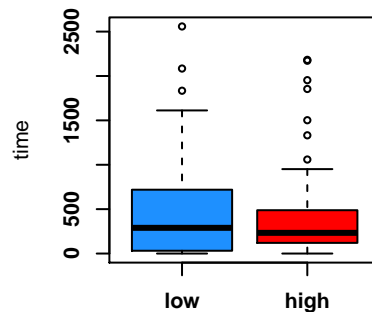

G12 KRAS greater

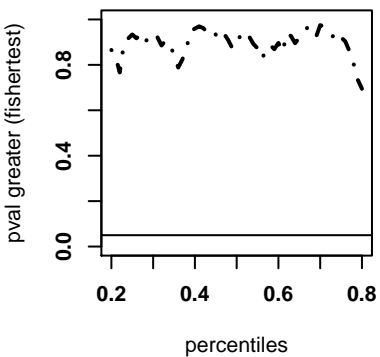

G12 KRAS less

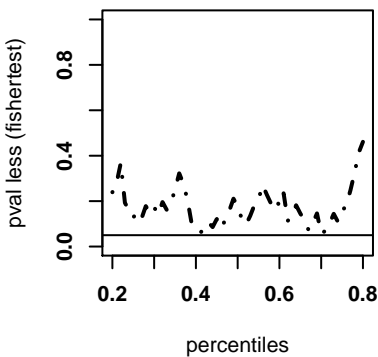

|           | G12    | none/other |
|-----------|--------|------------|
| low       | 30     | 18         |
| high      | 94     | 35         |
| pval_less | 0.1248 |            |
| pval_grea | 0.9347 |            |

GABARAPL1,PAAD LOG1P SCALED bestcutoff 46%

hazardratio

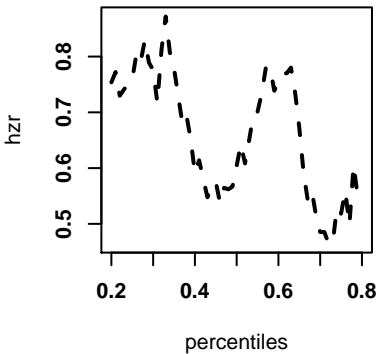

logrank pvalue

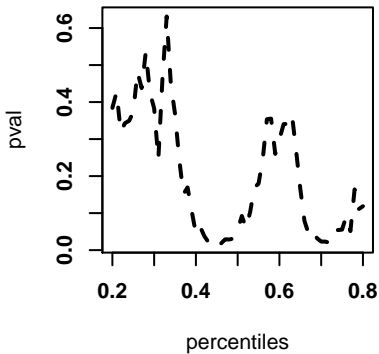

survivalplot

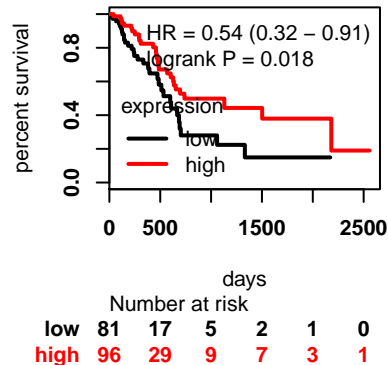

KRAS G12

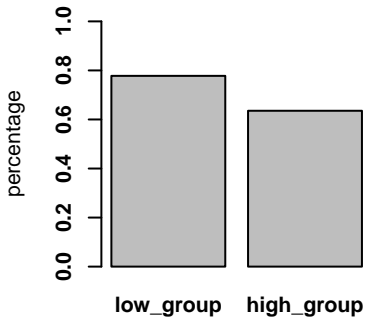

expression

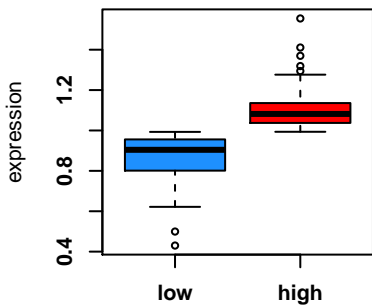

suvaltime

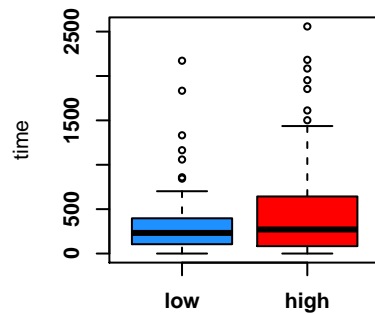

G12 KRAS greater

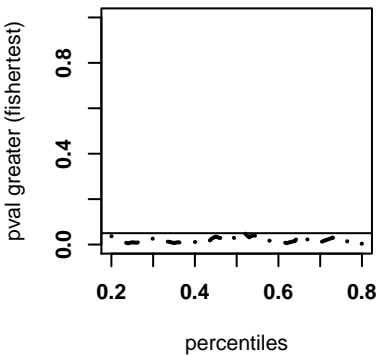

G12 KRAS less

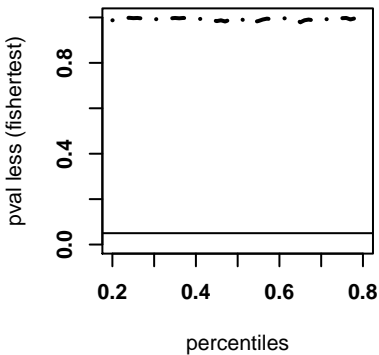

|           | G12     | none/other |
|-----------|---------|------------|
| low       | 63      | 18         |
| high      | 61      | 35         |
| pval_less | 0.9875  |            |
| pval_grea | 0.02841 |            |

ATG9B,PAAD LOG1P SCALED bestcutoff 21%

hazardratio

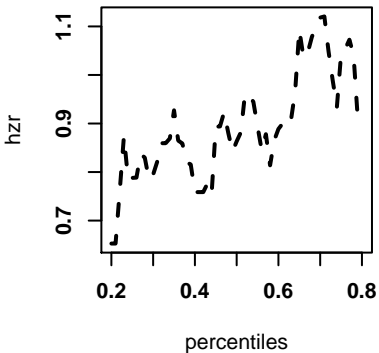

logrank pvalue

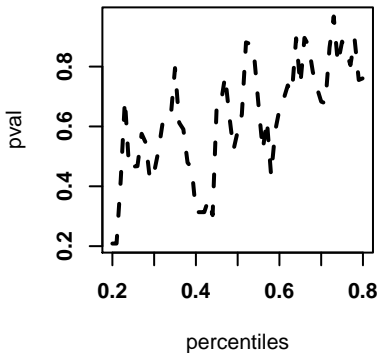

survivalplot

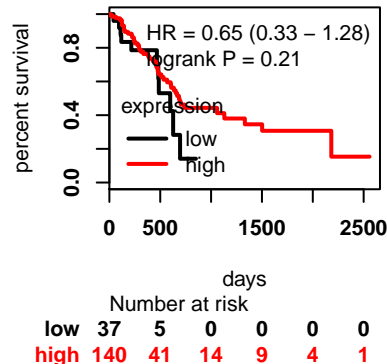

KRAS G12

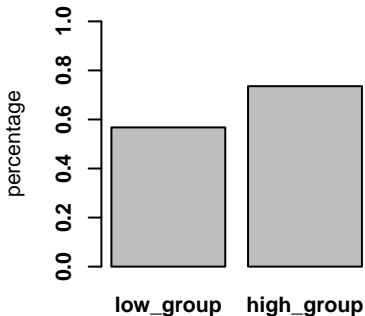

expression

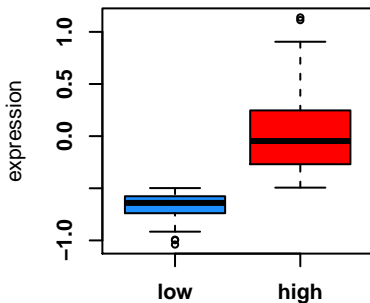

suvaltime

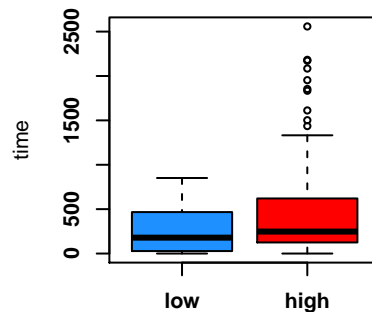

G12 KRAS greater

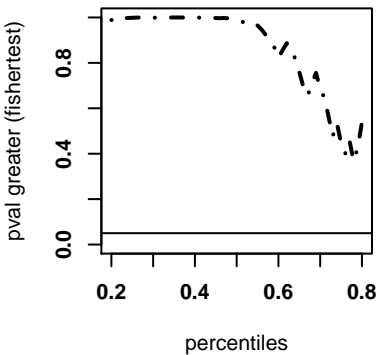

G12 KRAS less

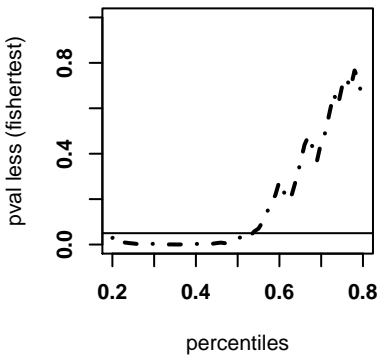

|           | G12     | none/other |
|-----------|---------|------------|
| low       | 21      | 16         |
| high      | 103     | 37         |
| pval_less | 0.03934 |            |
| pval_grea | 0.984   |            |

ATG9A,PAAD LOG1P SCALED bestcutoff 74%

hazardratio

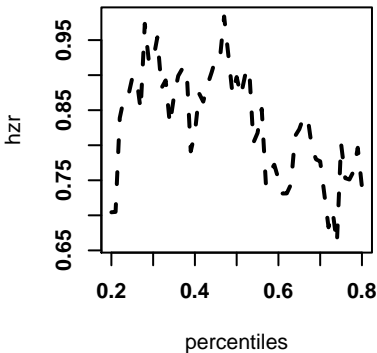

logrank pvalue

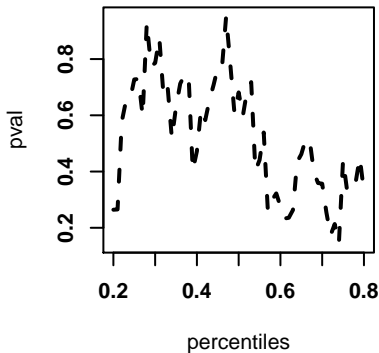

survivalplot

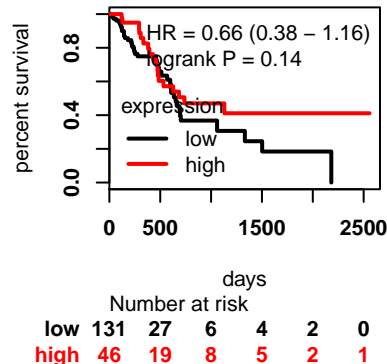

KRAS G12

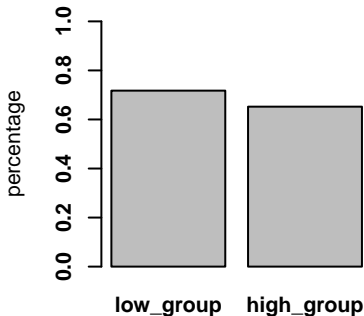

expression

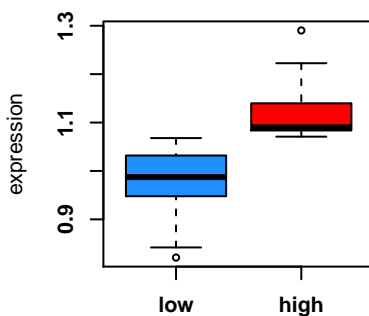

suvaltime

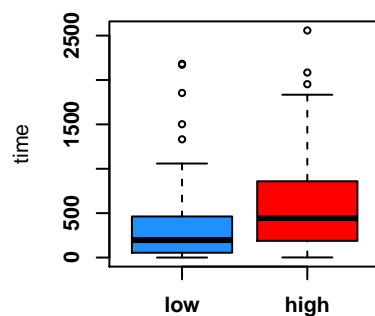

G12 KRAS greater

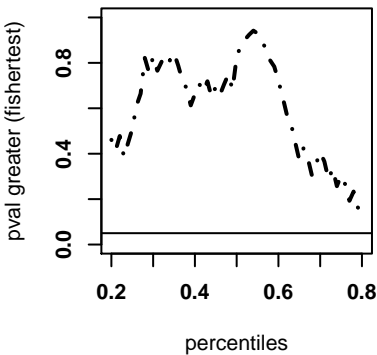

G12 KRAS less

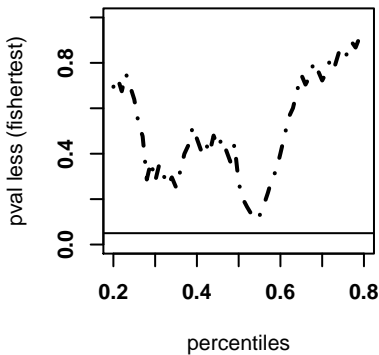

|           | G12    | none/other |
|-----------|--------|------------|
| low       | 94     | 37         |
| high      | 30     | 16         |
| pval_less | 0.8461 |            |
| pval_grea | 0.257  |            |

MAP1LC3C,PAAD LOG1P SCALED bestcutoff 53%

hazardratio

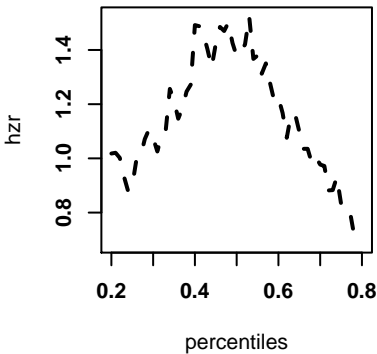

logrank pvalue

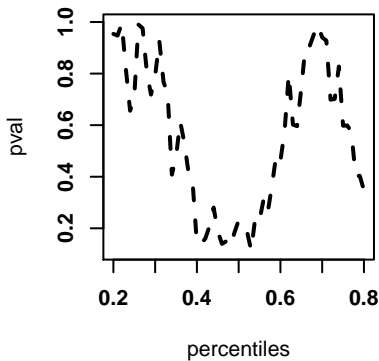

survivalplot

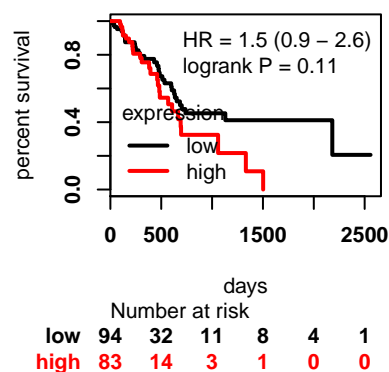

KRAS G12

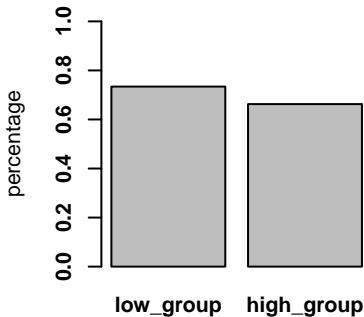

expression

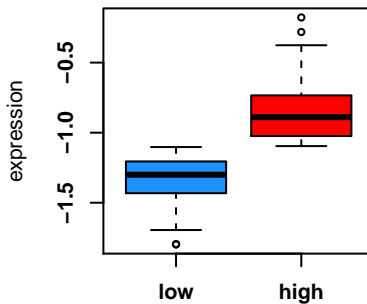

suivalttime

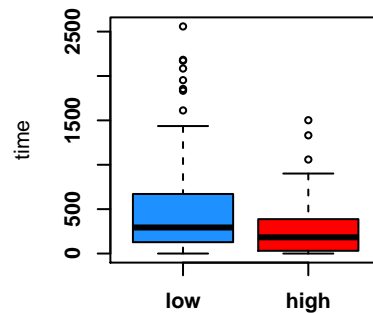

G12 KRAS greater

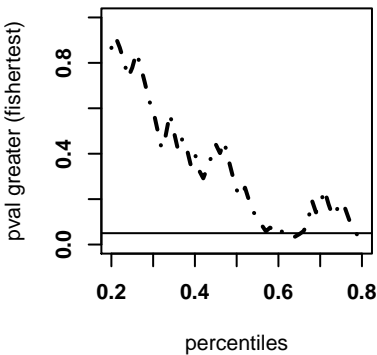

G12 KRAS less

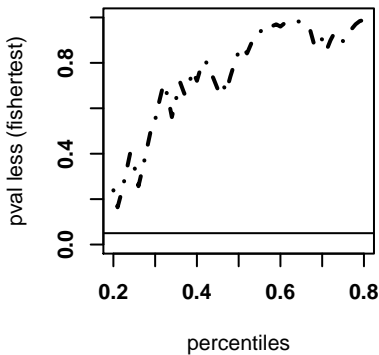

|           | G12    | none/other |
|-----------|--------|------------|
| low       | 69     | 25         |
| high      | 55     | 28         |
| pval_less | 0.8848 |            |
| pval_grea | 0.192  |            |

ABCB6,PAAD LOG1P SCALED bestcutoff 73%

hazardratio

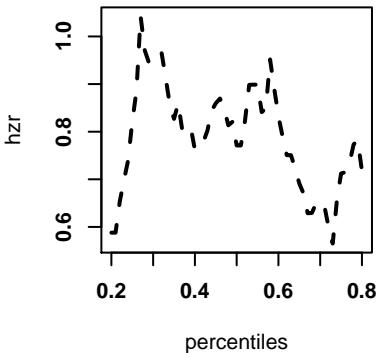

logrank pvalue

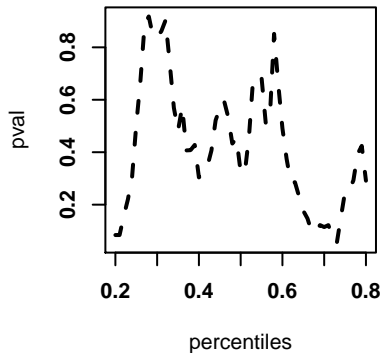

survivalplot

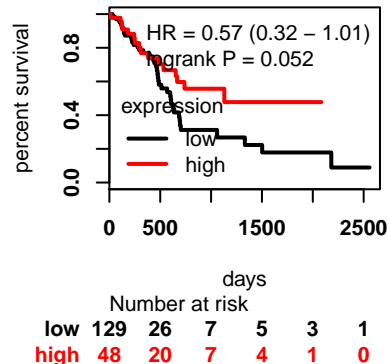

KRAS G12

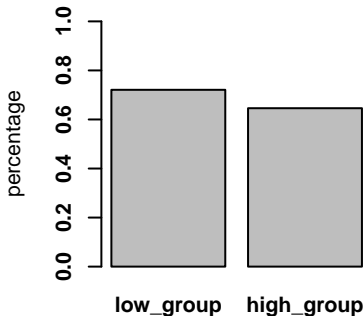

expression

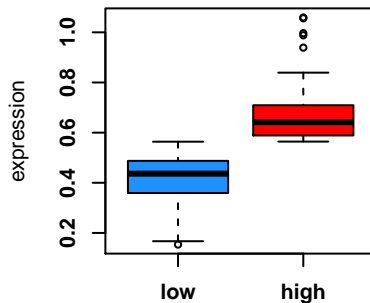

suivalttime

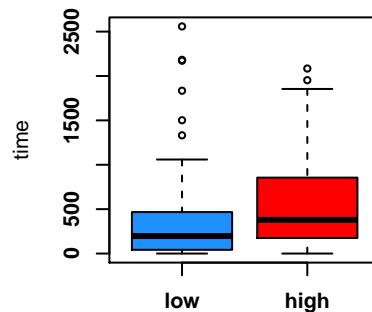

G12 KRAS greater

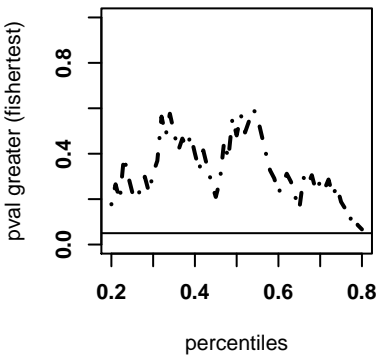

G12 KRAS less

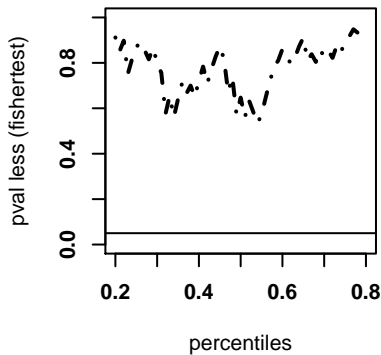

|           | G12    | none/other |
|-----------|--------|------------|
| low       | 93     | 36         |
| high      | 31     | 17         |
| pval_less | 0.8752 |            |
| pval_grea | 0.215  |            |

VT11A,PAAD LOG1P SCALED bestcutoff 33%

hazardratio

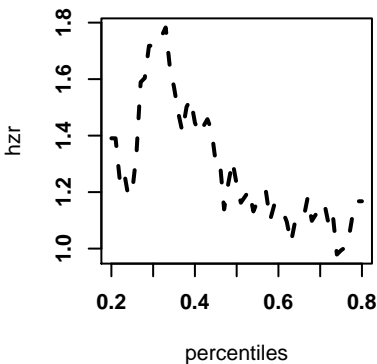

logrank pvalue

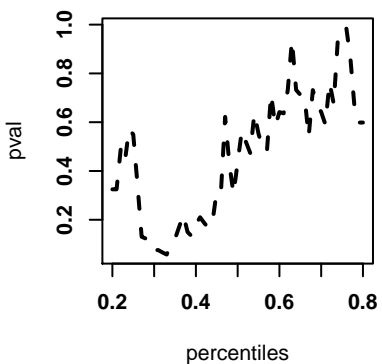

survivalplot

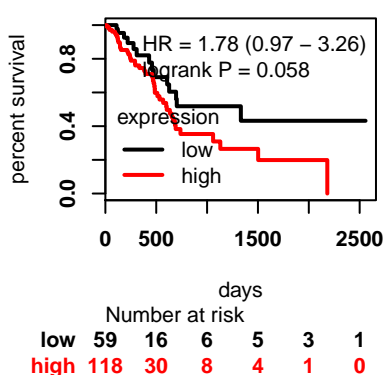

KRAS G12

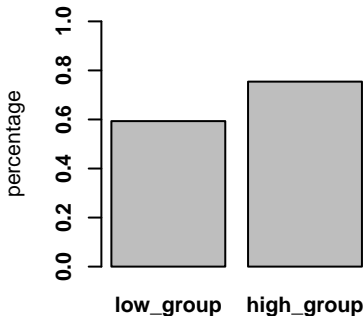

expression

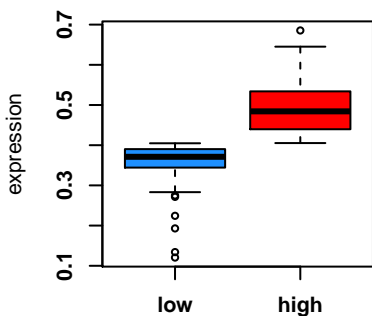

suvaltime

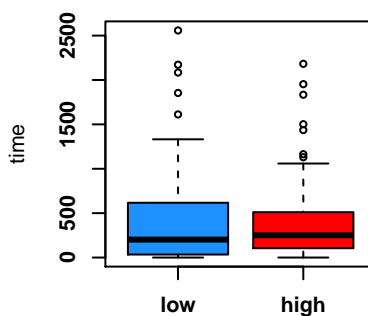

G12 KRAS greater

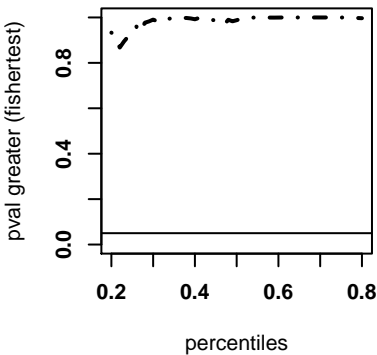

G12 KRAS less

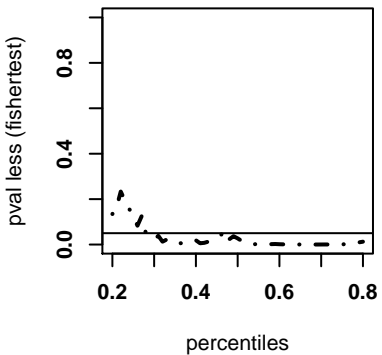

|           | G12     | none/other |
|-----------|---------|------------|
| low       | 35      | 24         |
| high      | 89      | 29         |
| pval_less | 0.02203 |            |
| pval_grea | 0.9907  |            |



STX17, PAAD LOG1P SCALED bestcutoff 68%

hazardratio

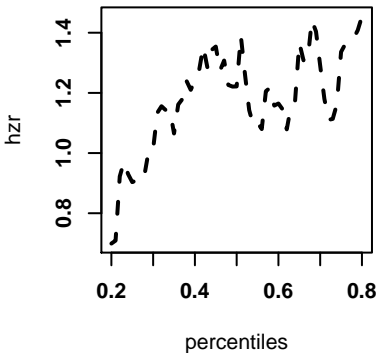

logrank pvalue

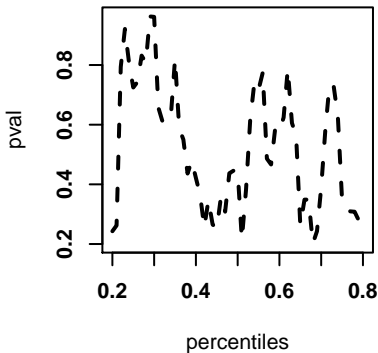

survivalplot

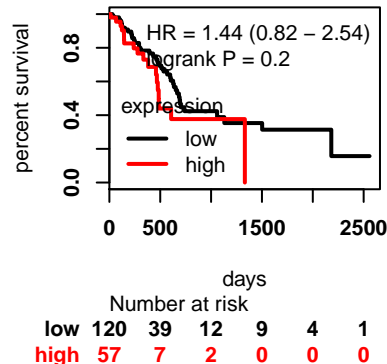

KRAS G12

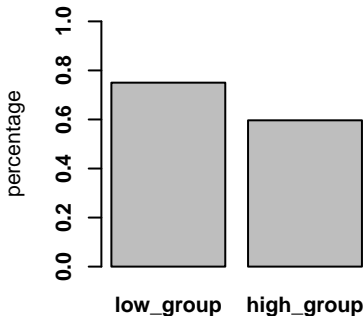

expression

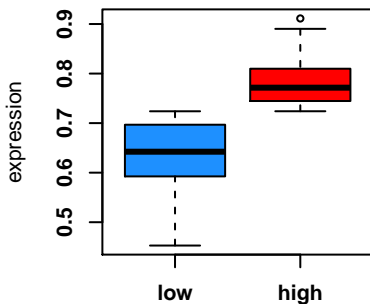

suvaltime

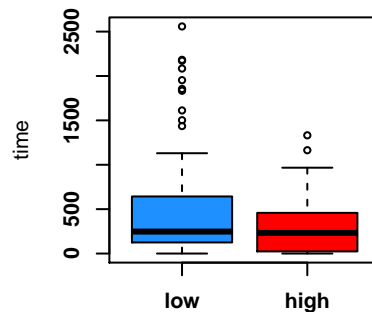

G12 KRAS greater

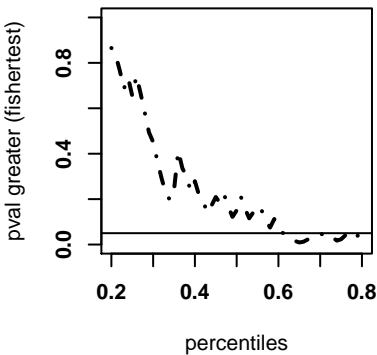

G12 KRAS less

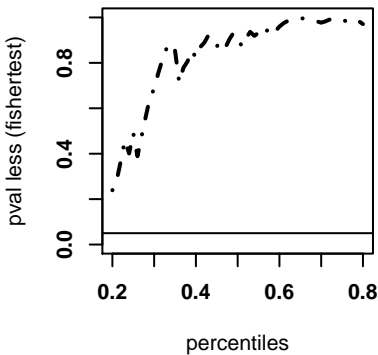

|           | G12     | none/other |
|-----------|---------|------------|
| low       | 90      | 30         |
| high      | 34      | 23         |
| pval_less | 0.9873  |            |
| pval_grea | 0.02926 |            |

VAMP5,PAAD LOG1P SCALED bestcutoff 63%

hazardratio

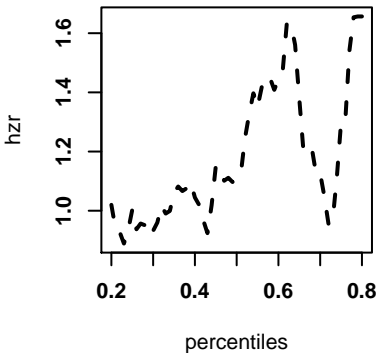

logrank pvalue

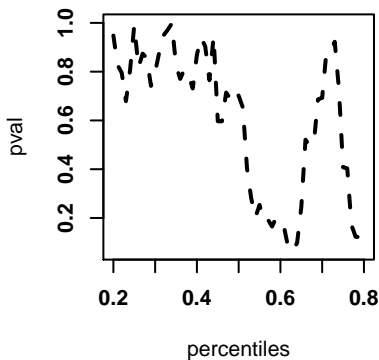

survivalplot

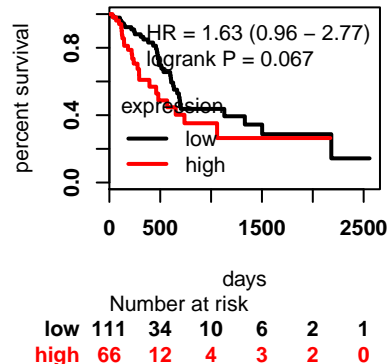

KRAS G12

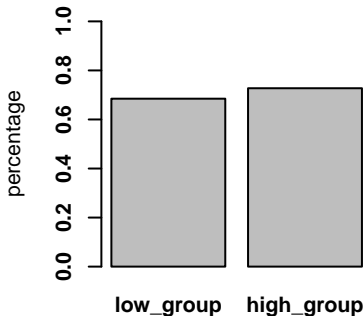

expression

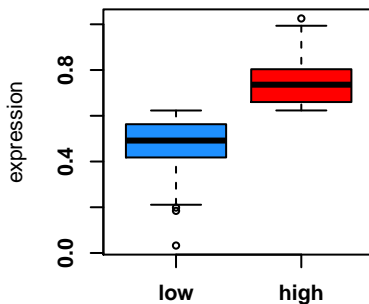

suvaltime

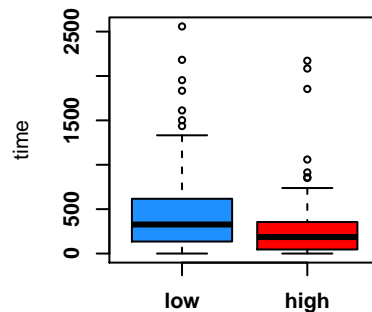

G12 KRAS greater

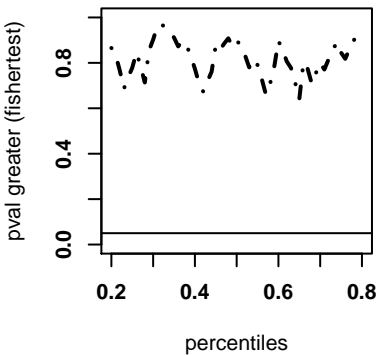

G12 KRAS less

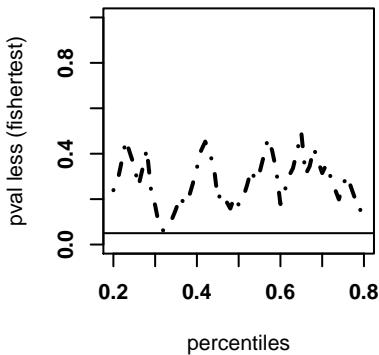

|           | G12    | none/other |
|-----------|--------|------------|
| low       | 76     | 35         |
| high      | 48     | 18         |
| pval_less | 0.336  |            |
| pval_grea | 0.7779 |            |

VAMP4,PAAD LOG1P SCALED bestcutoff 72%

hazardratio

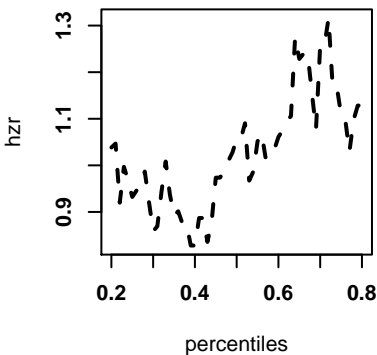

logrank pvalue

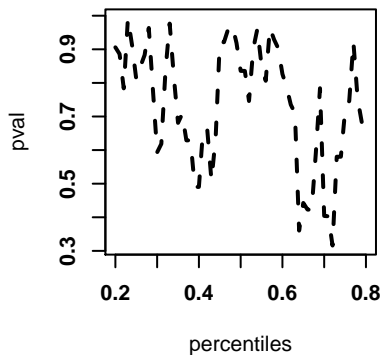

survivalplot

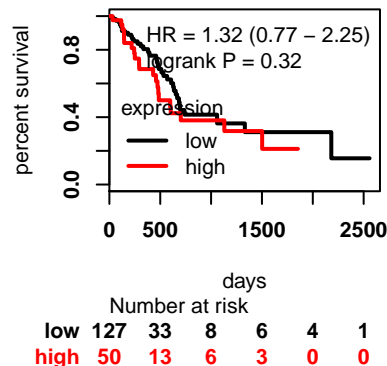

KRAS G12

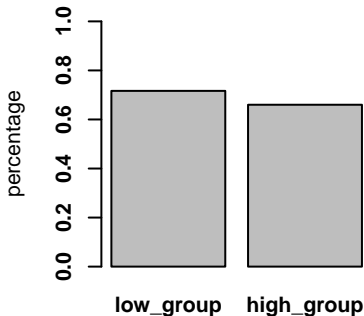

expression

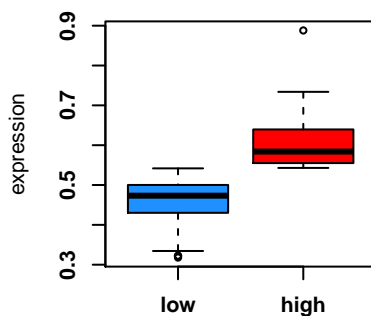

suvaltime

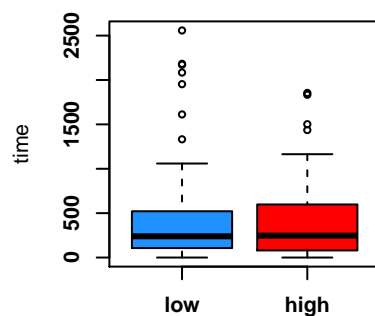

G12 KRAS greater

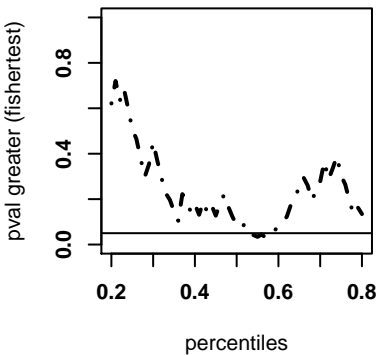

G12 KRAS less

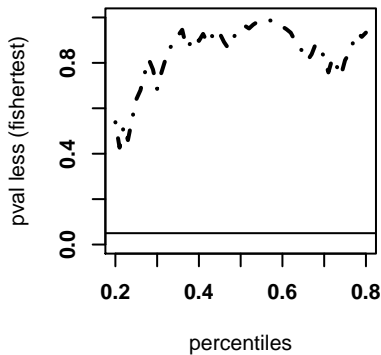

|           | G12    | none/other |
|-----------|--------|------------|
| low       | 91     | 36         |
| high      | 33     | 17         |
| pval_less | 0.822  |            |
| pval_grea | 0.2864 |            |
